# Supplementary material for: Antiproliferative Fatty Acids Isolated from the Polypore Fungus Onnia tomentosa
Source: MDPI journal article supplement (doi:10.3390/jof8111163), 2022-11-03
Supplement: s1 [file s1]

## Supplementary Materials

### **Antiproliferative Fatty Acids Isolated from the Polypore Fungus *Onnia tomentosa***

Hooi Xian Lee <sup>1</sup>, Wai Ming Li <sup>1</sup>, Jatinder Khatra<sup>1</sup>, Zhicheng Xia <sup>2</sup>, Oleg Sannikov <sup>2</sup>, Yun Ling <sup>2</sup>, Haoxuan Zhu <sup>2</sup>, and Chow H. Lee <sup>1,\*</sup>

<sup>1</sup>Department of Chemistry and Biochemistry, Faculty of Science and Engineering, University of Northern British Columbia, Prince George, BC V2N 4Z9, Canada.

<sup>2</sup>Department of Chemistry, University of British Columbia, Vancouver, BC V6T 1Z1, Canada.

\*Corresponding authors: [chow.lee@unbc.ca](mailto:chow.lee@unbc.ca)

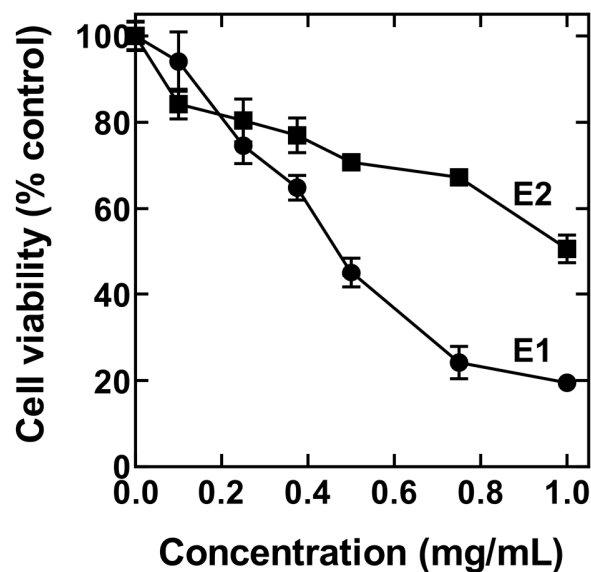

**Figure S1.** Effects of crude extracts from *O. tomentosa* (CL312) on HeLa cells. Cells were treated with different concentrations of E1 and E2 extracts from *O. tomentosa* for 48 h, followed by cell viability assessment using the MTT assay. The result shown is representative data from three biological replicates ( $n = 3$ ). Error bars indicate standard deviation (S.D.).

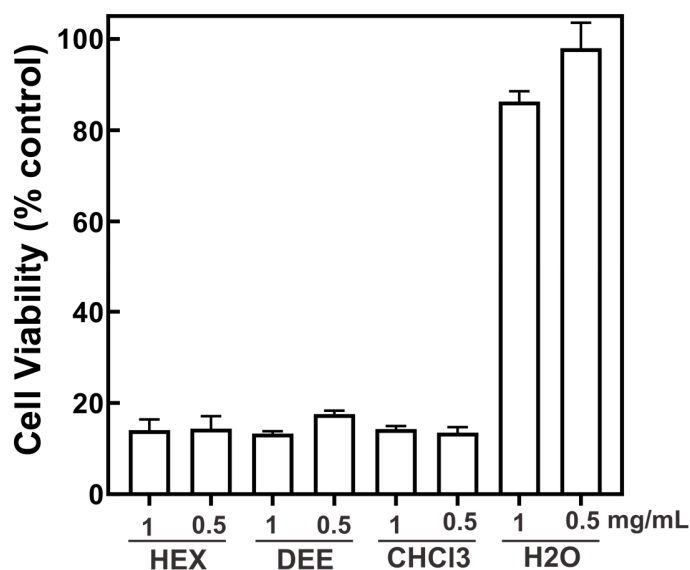

**Figure S2.** Effects of E1-extracted organic phase separated layers on the proliferation of HeLa cells. Cells were treated with two different concentrations of hexane (HEX), diethyl ether (DEE), chloroform (CHCl<sub>3</sub>), and water (H<sub>2</sub>O) layers for 48 hours, and cell viability was measured using the MTT assay. The result shown is representative data from three biological replicates ( $n = 3$ ). Error bars indicate standard deviation (S.D.).

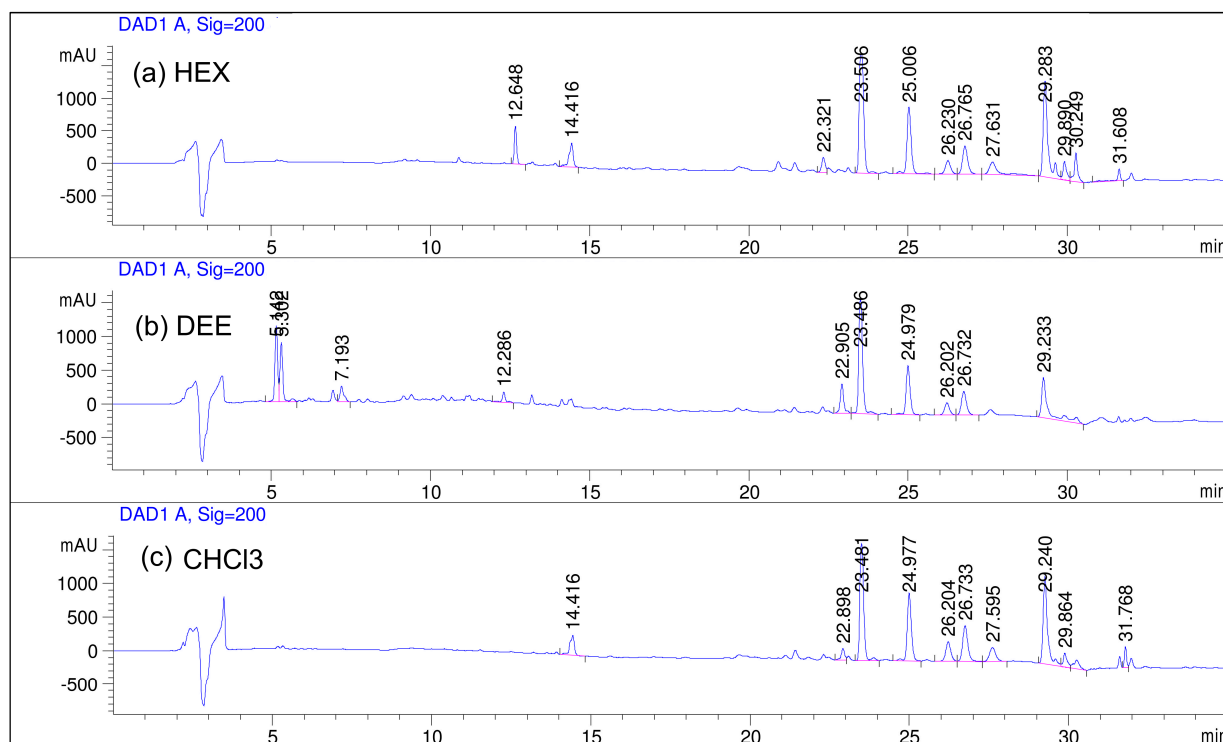

**Figure S3.** HPLC UV spectrum at  $\lambda = 200$  nm. Comparing the detected peaks amongst the phase-separated organic layers: (a) hexane (HEX); (b) diethyl ether (DEE); (c) chloroform ( $\text{CHCl}_3$ ). Analysis was done using a phenyl-hexyl column ( $4.6 \text{ mm} \times 250 \text{ mm} \times 5 \mu\text{m}$ ) with a gradient mobile phase composed of an  $\text{H}_2\text{O}$  solution of 0.1 % formic acid (solvent A) and  $\text{CH}_3\text{CN}$  containing 0.1% formic acid (solvent B); flow rate of 1 mL/min. The gradient elution program was set as follows: 0 min (25% B), 5 min (35% B), 12 min (70% B), 17 min (70 % B), 20 min (85% B), 25 min (85% B), 28 min (100% B), and 35 min (100% B).

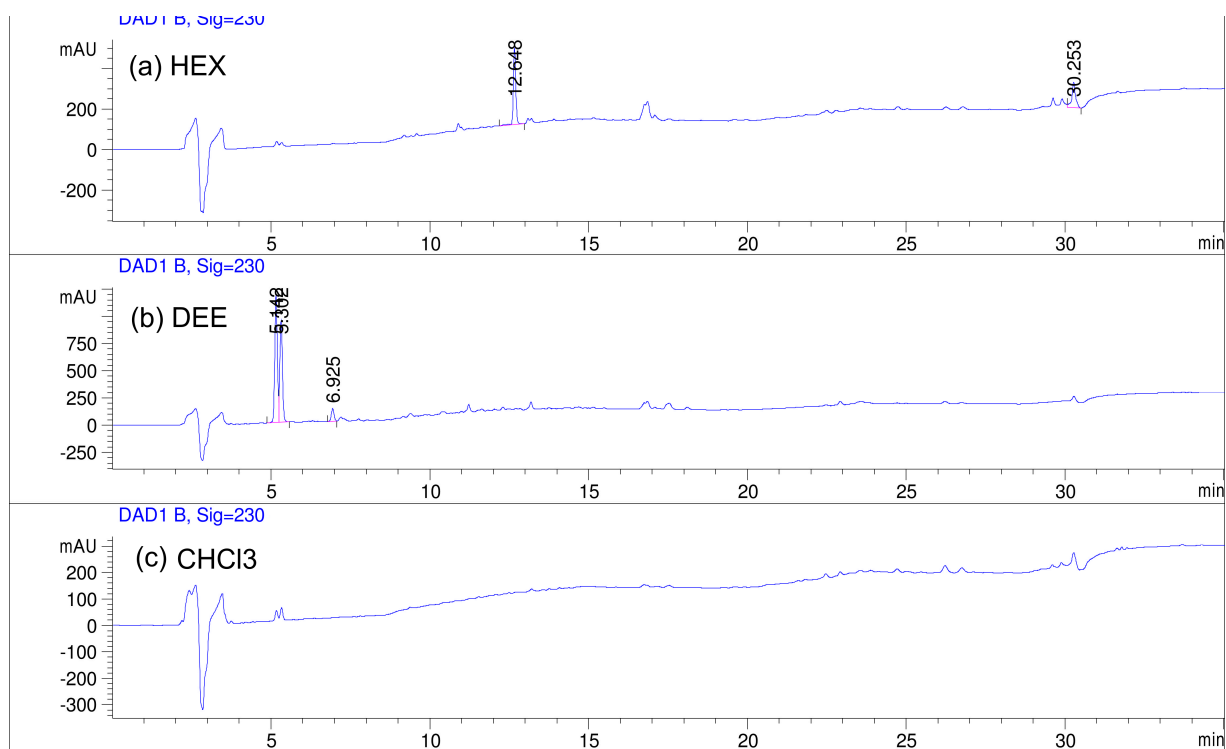

**Figure S4.** HPLC UV spectrum at  $\lambda = 230$  nm. Comparing the detected peaks amongst the phase-separated organic layers: (a) hexane (HEX); (b) diethyl ether (DEE); (c) chloroform ( $\text{CHCl}_3$ ). The chromatographic system (column and solvents) used was as those described in Figure S3.



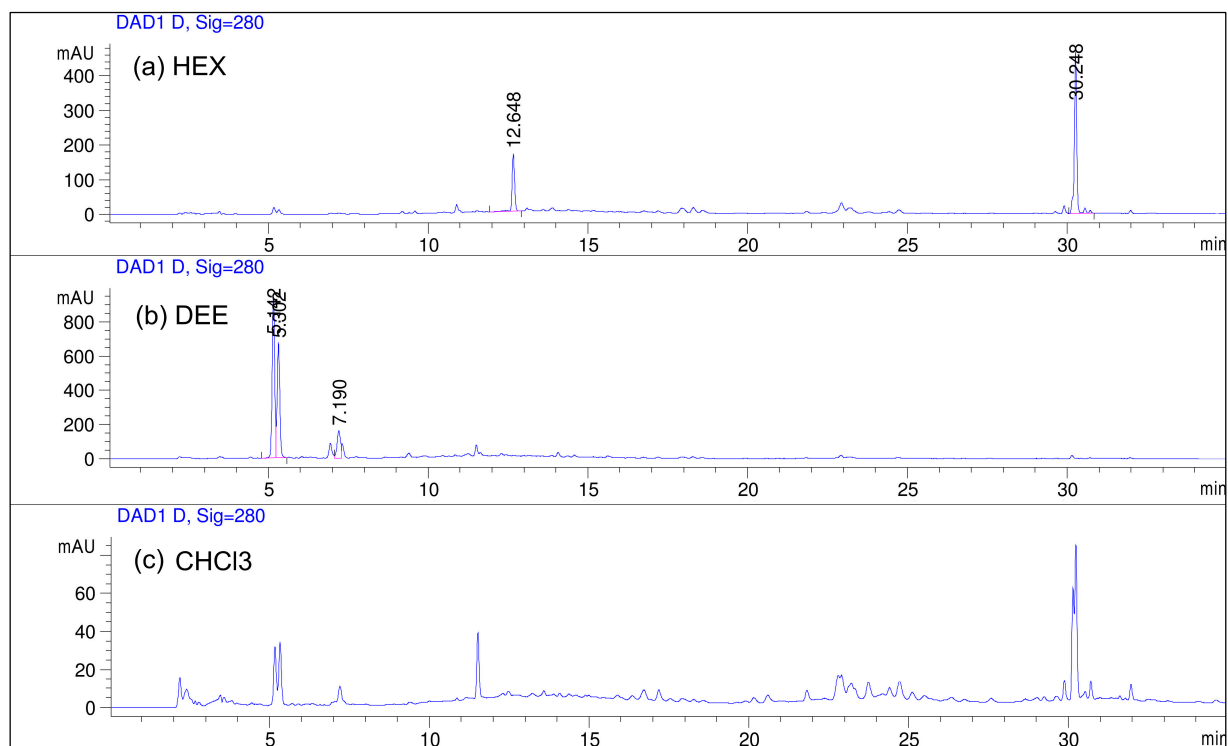

**Figure S5.** HPLC UV spectrum at  $\lambda = 280$  nm. Comparing the detected peaks amongst the phase-separated organic layers: (a) hexane (HEX); (b) diethyl ether (DEE); (c) chloroform ( $\text{CHCl}_3$ ). The chromatographic system (column and solvents) used was as those described in Figure S3.

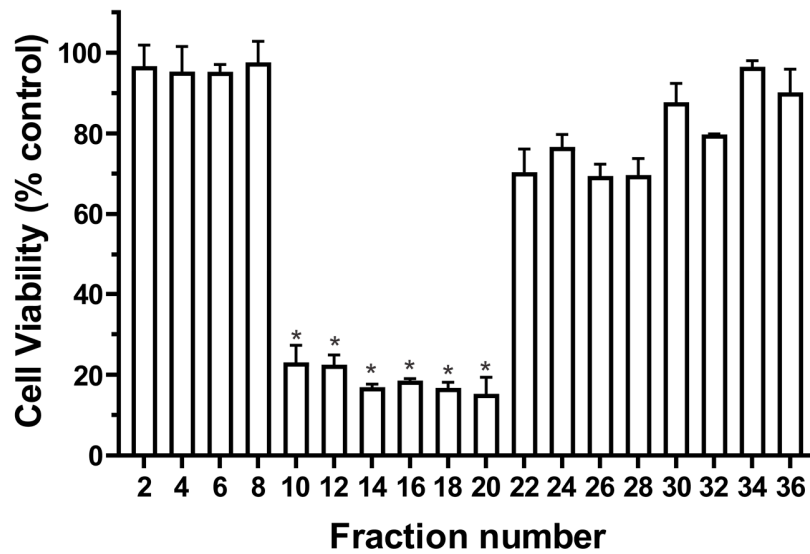

**Figure S6.** Effects of post-Sephadex LH-20 fractions on the proliferation of HeLa cells. Hexane layer extract was run on Sephadex LH-20 column and fractions were collected as described in the Materials and Methods. Two  $\mu$ L of each fraction was added to HeLa cells in 96-well plates. Cell viability was assessed using the MTT assay. The result shown is representative data from three biological replicates ( $n = 3$ ). Error bars indicate standard deviation (S.D.). \*Indicated the active fractions.

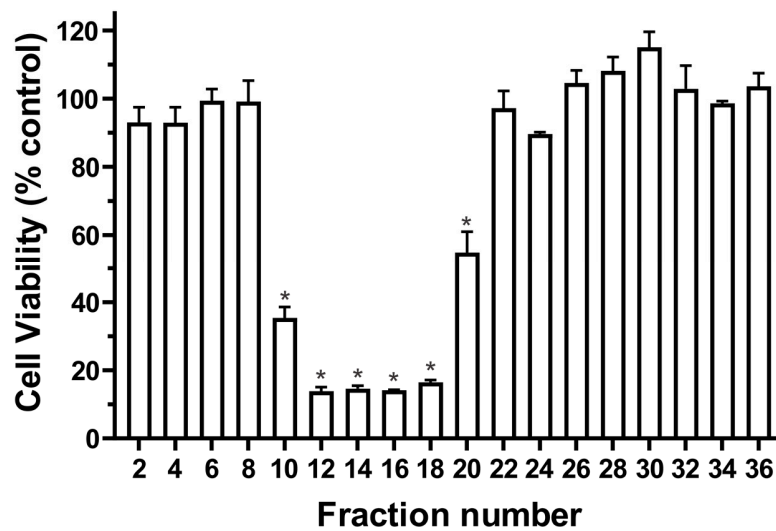

**Figure S7.** Effects of post-Sephadex LH-20 fractions on the proliferation of HeLa cells. Diethyl ether layer extract was run on Sephadex LH-20 column and fractions were collected as described in the Materials and Methods. Two  $\mu$ L of each fraction was added to HeLa cells in 96-well plates. Cell viability was assessed using the MTT assay. The result shown is representative data from three biological replicates ( $n = 3$ ). Error bars indicate standard deviation (S.D.). \*Indicated the active fractions.

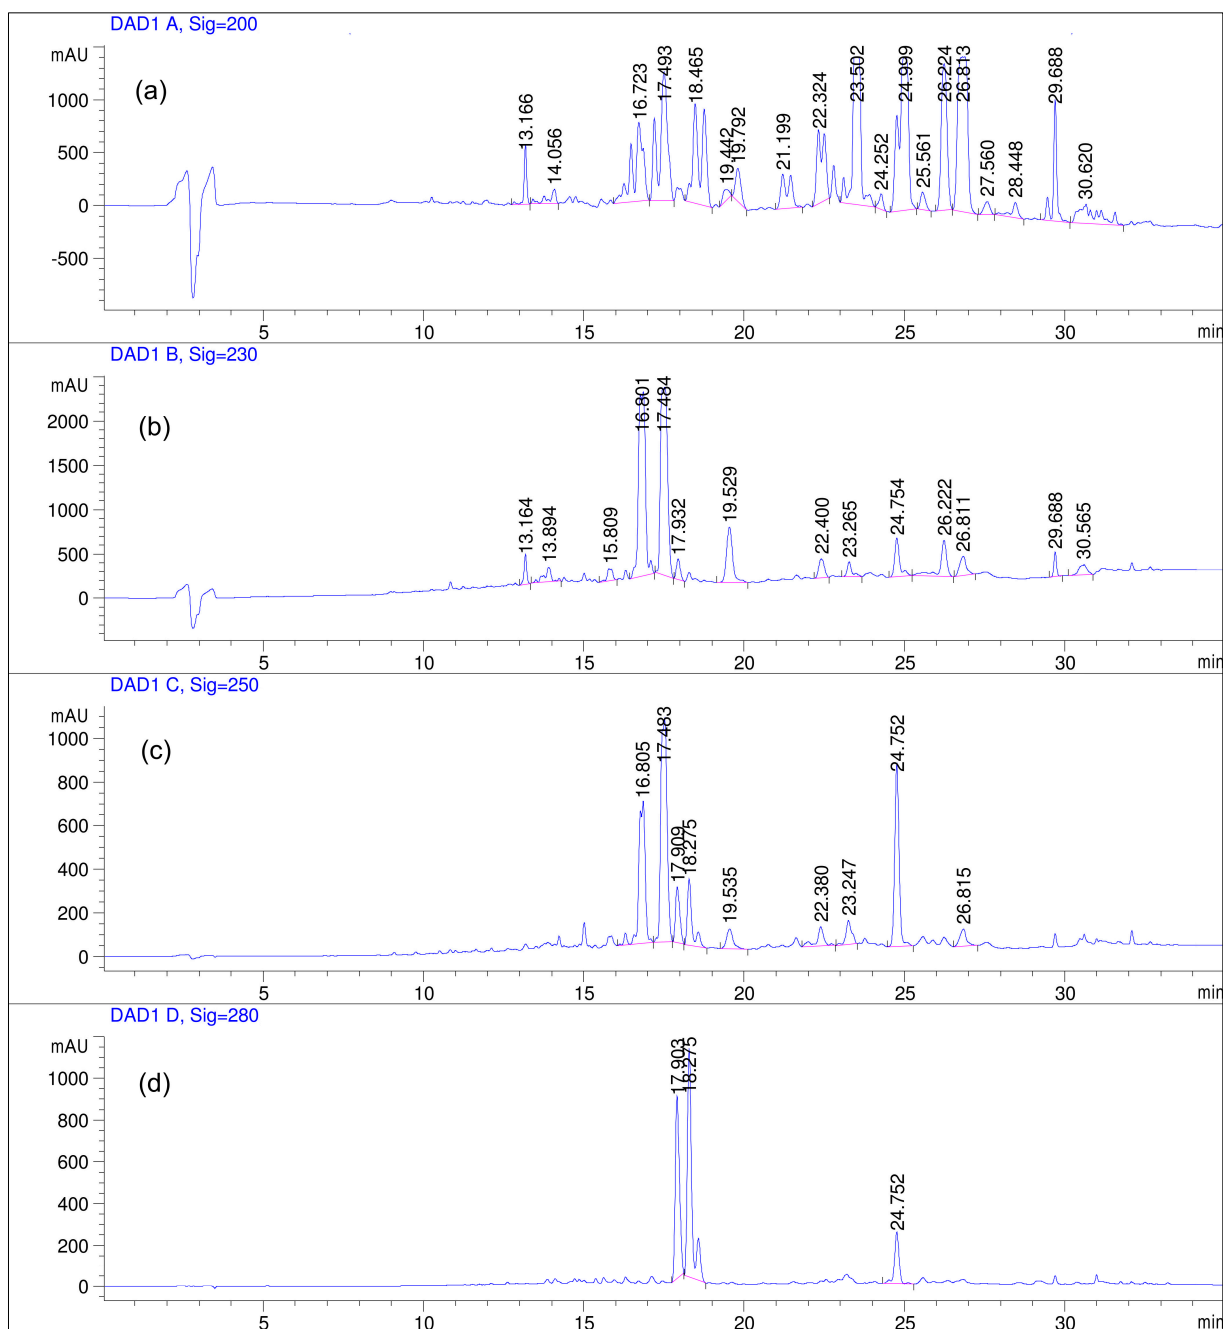

**Figure S8.** HPLC analyses of HEX layer post-Sephadex LH-20 fractionation. UV spectrum showing peaks detected at the different wavelengths: (a) 200nm; (b) 230nm; (c) 250nm; (d) 280nm. The chromatographic system (column and solvents) used was as those described in Figure S3.

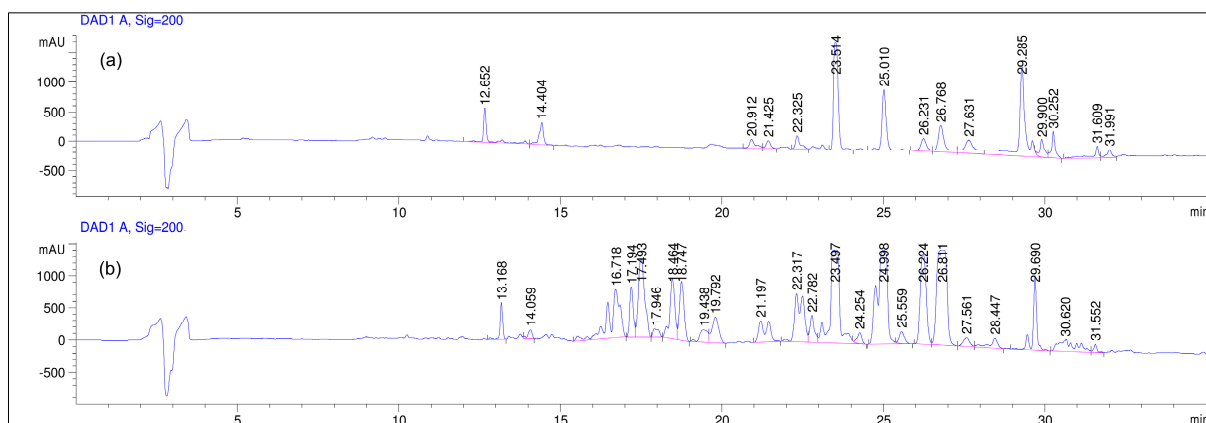

**Figure S9.** HPLC analyses of the HEX layer before and after Sephadex LH-20 chromatography. UV spectrum showing peaks detected at  $\lambda = 200$  nm in the HEX layer: (a) before Sephadex LH-20 fractionation; (b) post-Sephadex LH20 fractionation. The chromatographic system (column and solvents) used was as those described in Figure S3.

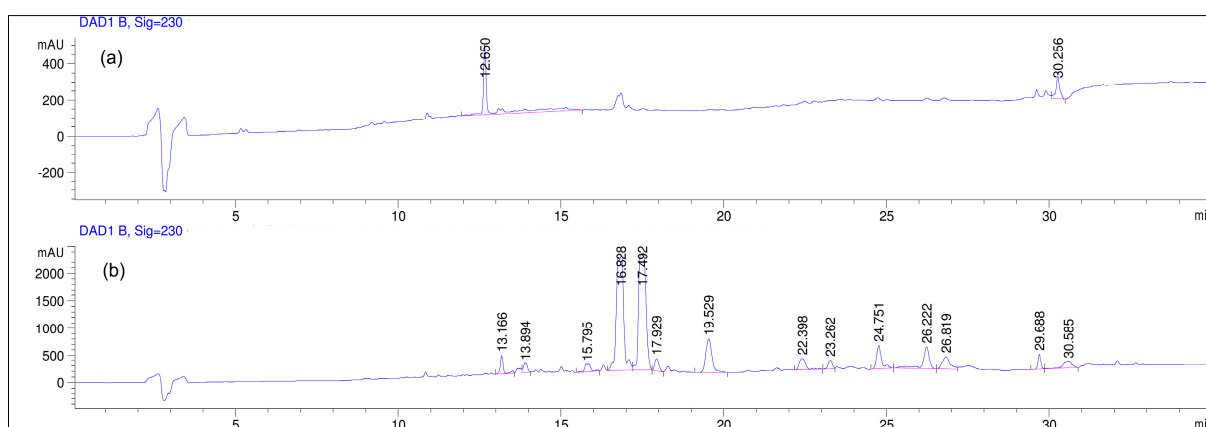

**Figure S10.** HPLC analyses of the HEX layer before and after Sephadex LH-20 chromatography. UV spectrum showing peaks detected at  $\lambda = 230$  nm in the HEX layer: (a) before Sephadex LH-20 fractionation; (b) post-Sephadex LH20 fractionation. The chromatographic system (column and solvents) used was as those described in Figure S3.

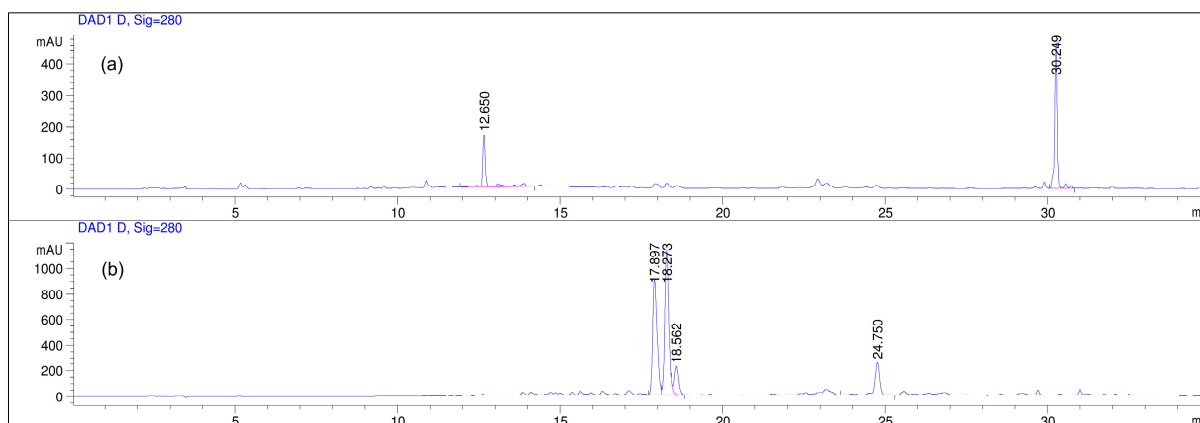

**Figure S11.** HPLC analyses of the HEX layer before and after Sephadex LH-20 chromatography. UV spectrum showing peaks detected at  $\lambda = 280$  nm in the HEX layer: (a) before Sephadex LH-20 fractionation; (b) post-Sephadex LH20 fractionation. The chromatographic system (column and solvents) used was as those described in Figure S3.

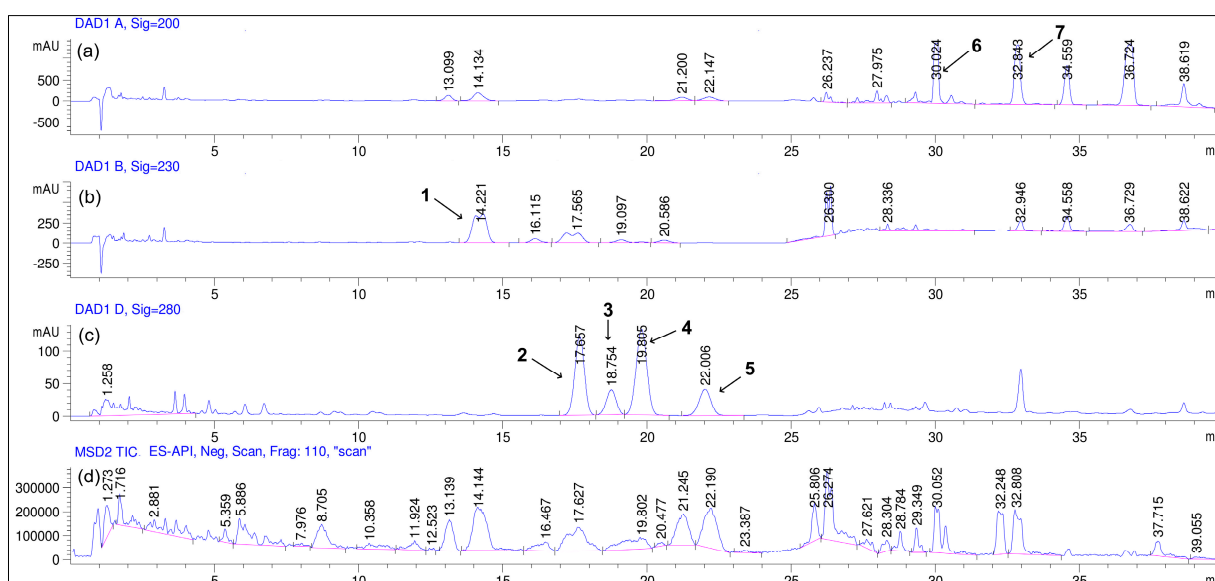

**Figure S12.** HPLC-MS analyses of antiproliferative fraction collected from Sephadex LH-20 column chromatography. HPLC UV spectrum showing the peaks detected at: (a) 200 nm; (b) 230 nm; (c) 280 nm. (d) HPLC-MS scan spectrum showed peaks detected from  $m/z$  100 to 1000. Numbers 1–7 were the compounds identified in the active fraction. Analysis was done using a Phenomenex Luna C18 (2) column (4.6 mm  $\times$  100 mm  $\times$  3  $\mu$ m) with a gradient mobile phase composed of an H<sub>2</sub>O solution of 0.1% formic acid (solvent A) and CH<sub>3</sub>CN containing 0.1% formic acid (solvent B); flow rate of 1 mL/min. The gradient elution program was set as follows: 0 min (52% B), 23 min (52% B), 25 min (90% B), 35 min (90% B), 38 min (100% B), and 40 min (100% B).

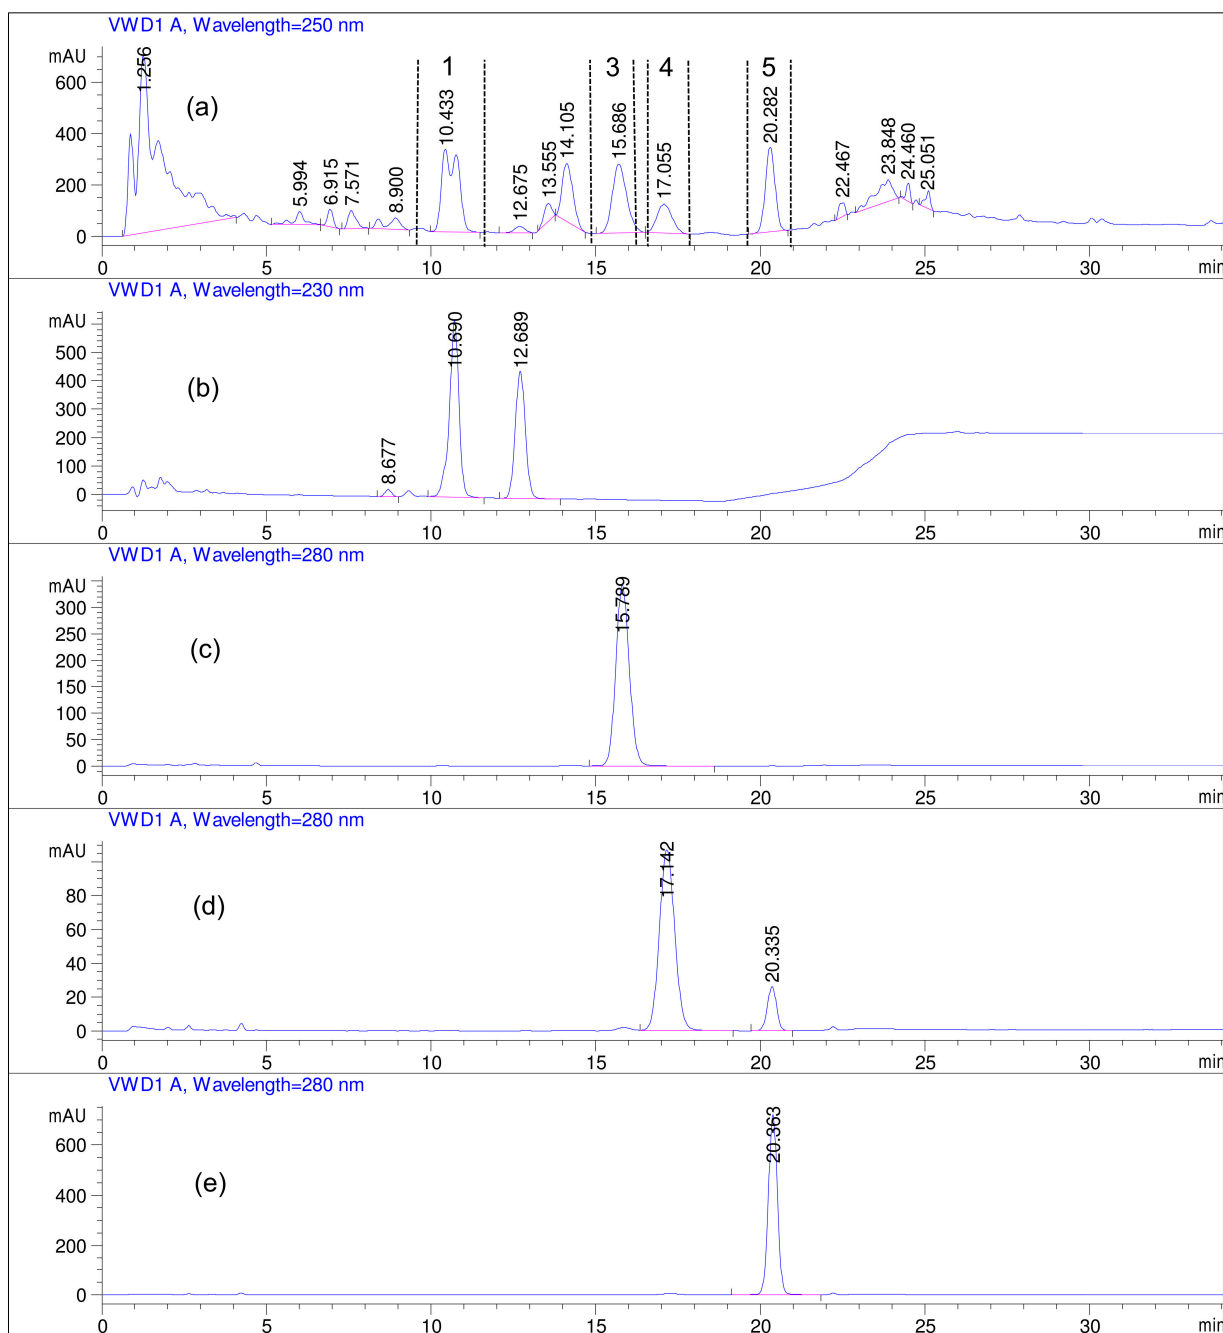

**Figure S13.** HPLC UV chromatogram showing mixture **1** and compounds **3**–**5** purification process: (a) before HPLC chromatographic purification (the dashed lines represent the collected fraction during the fractionation process); (b) mixture **1** post-HPLC chromatographic purification; (c) compound **3** post-HPLC chromatographic purification; (d) compound **4** post-HPLC chromatographic purification (exists as a mixture with compound **5** detected); (e) compound **5** post-HPLC chromatographic purification. Purification was performed using an Agilent Infinity Lab Poroshell 120 EC-C18 column (4.6 mm × 100 mm × 2.7 μm) with a gradient mobile phase composed of an H<sub>2</sub>O solution of 0.1% formic acid (solvent A) and CH<sub>3</sub>CN containing 0.1% formic acid (solvent B); flow rate of 1 mL/min. The gradient elution program was set as follows: 0 min (55% B), 17 min (46.5% B), 21 min (70% B), 23 min (100% B), and 35 min (100% B).

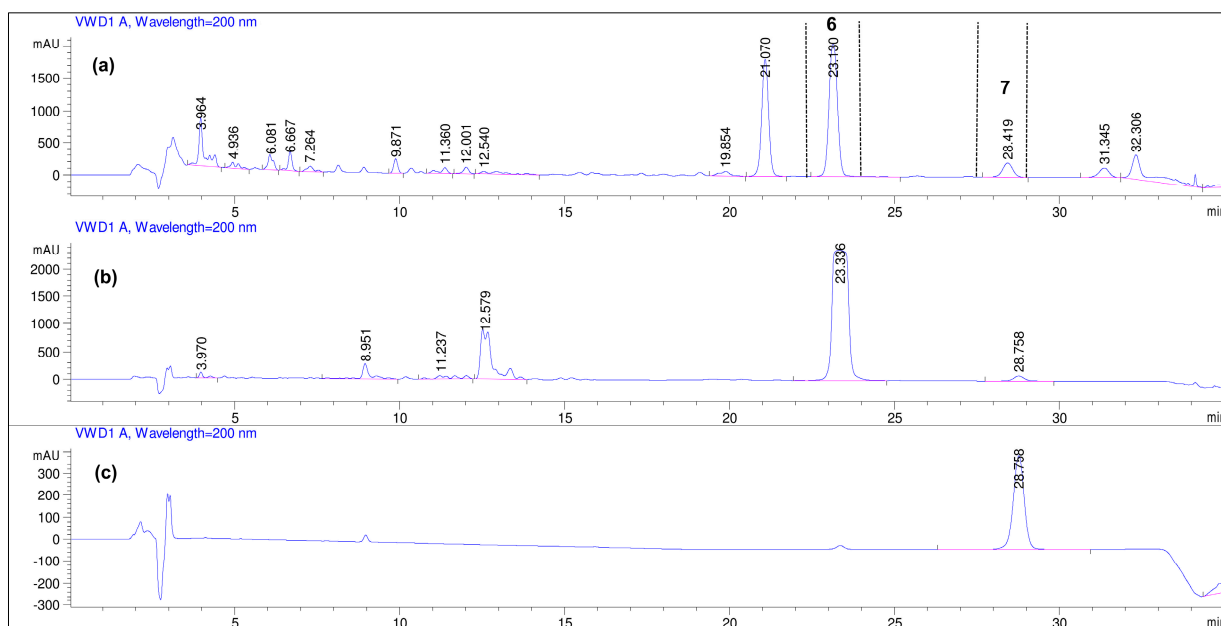

**Figure S14.** HPLC UV chromatogram showing compounds **6** and **7** purification process: (a) before HPLC chromatographic purification (the dashed lines represent the collected fraction during the fractionation process); (b) compound **6** post-HPLC chromatographic purification (exists as a mixture of compounds); (c) compound **7** post-HPLC chromatographic purification. Purification was performed using a Phenomenex Phenyl-hexyl column (4.6 mm × 250 mm × 5 μm) with a gradient mobile phase composed of an H<sub>2</sub>O solution of 0.1% formic acid (solvent A) and CH<sub>3</sub>CN containing 0.1% formic acid (solvent B) at a flow rate of 1 mL/min. The mobile phase gradient was set as follows: 0 min (55% B), 15 min (70% B), 31 min (70% B), 32 min (100% B), and 35 min (100% B).

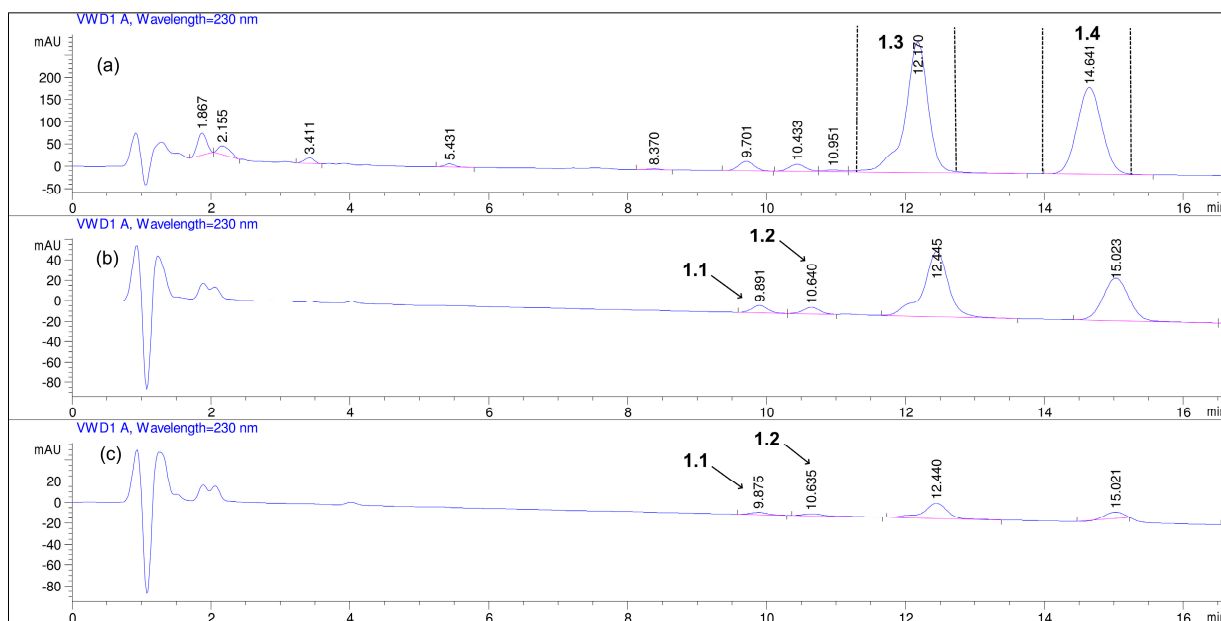

**Figure S15.** HPLC UV chromatogram showing mixture **1** purification process: (a) before HPLC chromatographic purification of compounds labeled as **1.3** and **1.4** (the dashed lines represent the collected fraction during the fractionation process); (b) compound **1.3** post-HPLC chromatographic purification produced two major (compounds **1.3** and **1.4**) and two minor (compounds **1.1** and **1.2**) peaks. (c) compound **1.4** post-HPLC chromatographic purification produced two major (compounds **1.3** and **1.4**) and two minor (compounds **1.1** and **1.2**) peaks. Purification was performed using an Agilent Infinity Lab Poroshell 120 EC-C18 column (4.6 mm × 100 mm × 2.7 μm) with a gradient mobile phase composed of an H<sub>2</sub>O solution of 0.1% formic acid (solvent A) and CH<sub>3</sub>CN containing 0.1% formic acid (solvent B); flow rate of 1 mL/min. The gradient elution program was set as follows: 0 min (55% B), 15 min (47.5% B), and 17 min (100% B).



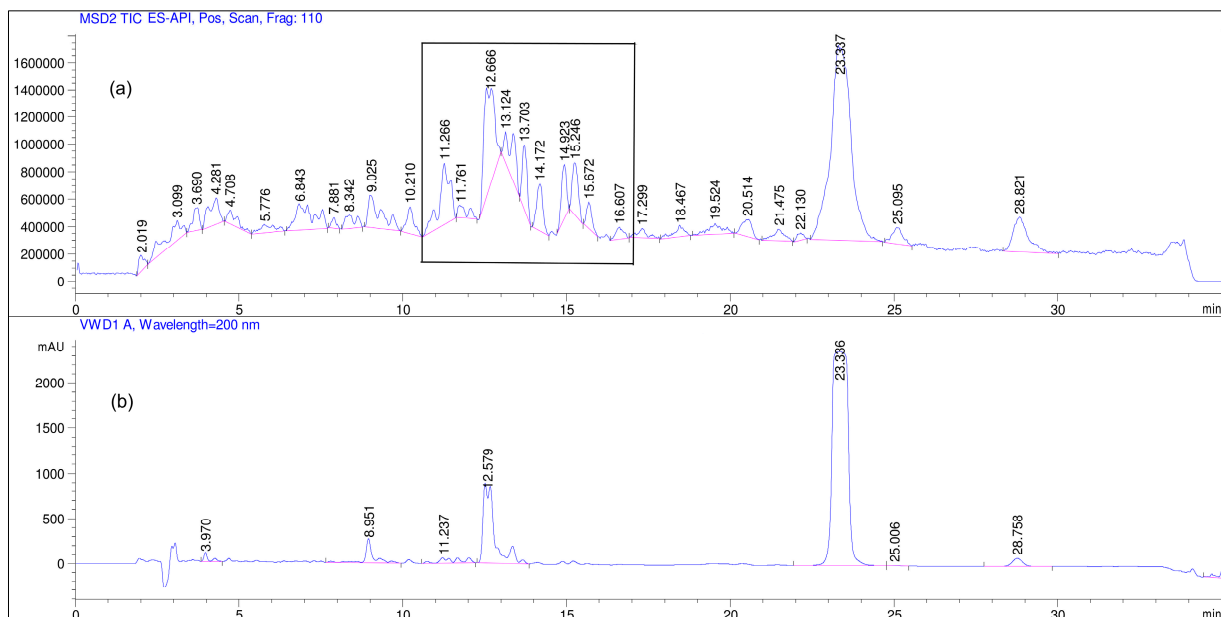

**Figure S16.** HPLC-LRMS analysis of compound **6**. (a) MS scan spectrum detected from  $m/z$  100 to 1000 (the boxed area indicates detected compounds with mass of 294–296 Da); (b) compound **6** post-HPLC purification (exists as a mixture of compounds). The chromatographic system (column and solvents) used was as those described in Figure S14.

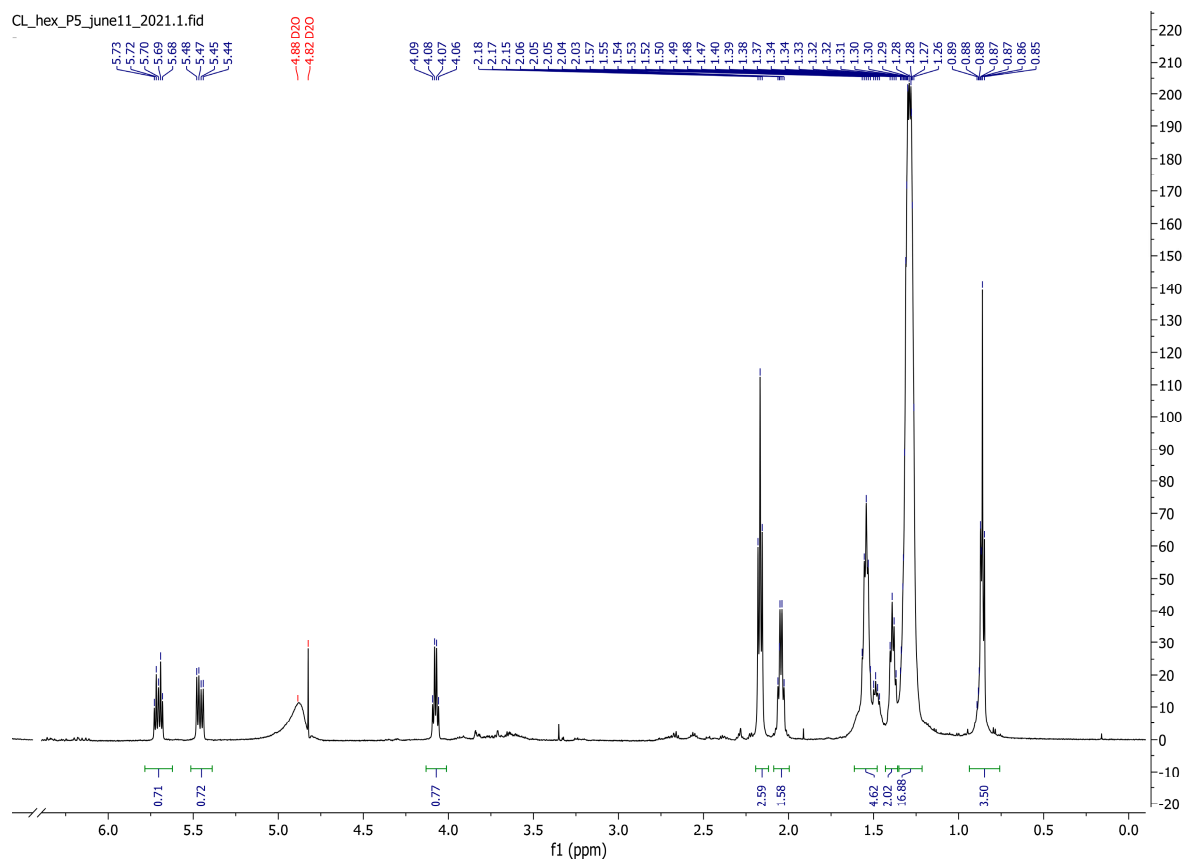

**Figure S17.**  $^1\text{H}$  NMR spectrum of **5**. Sample was prepared in  $\text{D}_2\text{O}$  and run at 600 MHz.

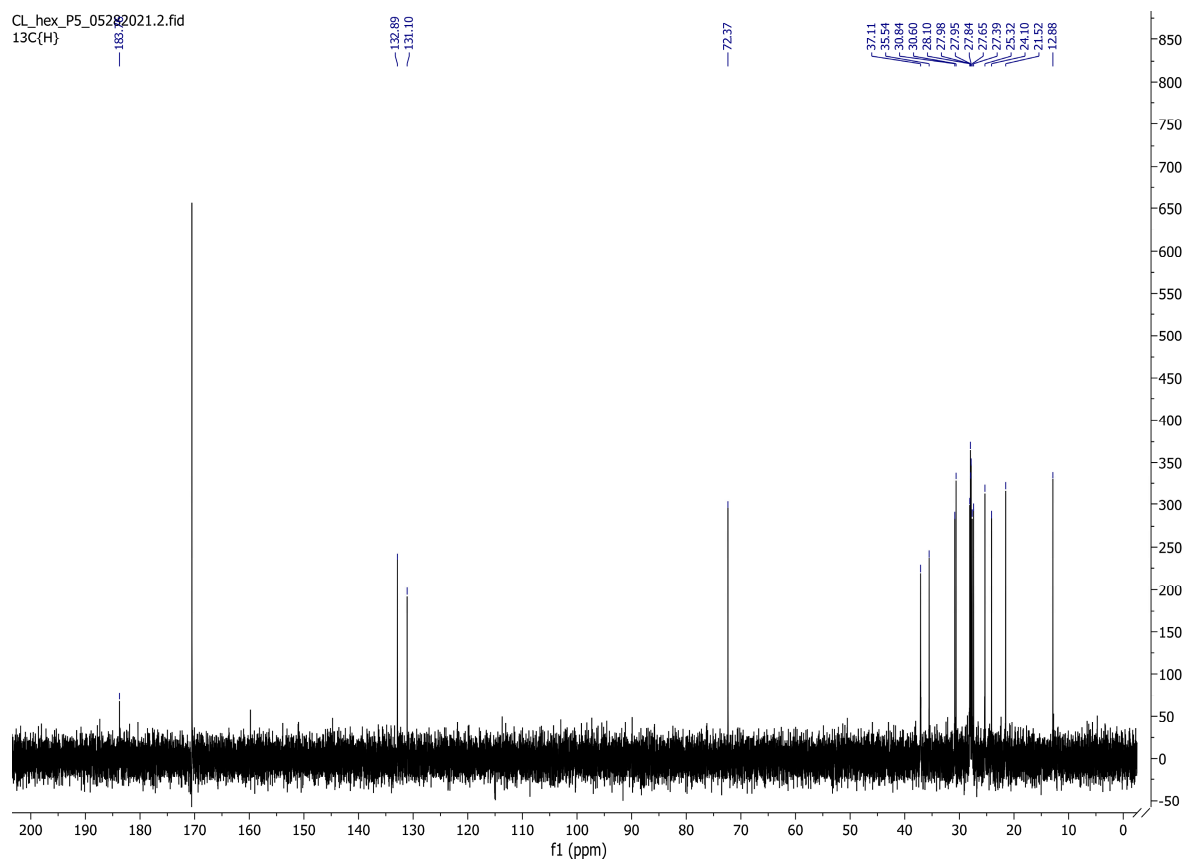

**Figure S18.**  $^{13}\text{C}$  NMR spectrum of **5**. Sample was prepared in  $\text{D}_2\text{O}$  and run at 151 MHz.

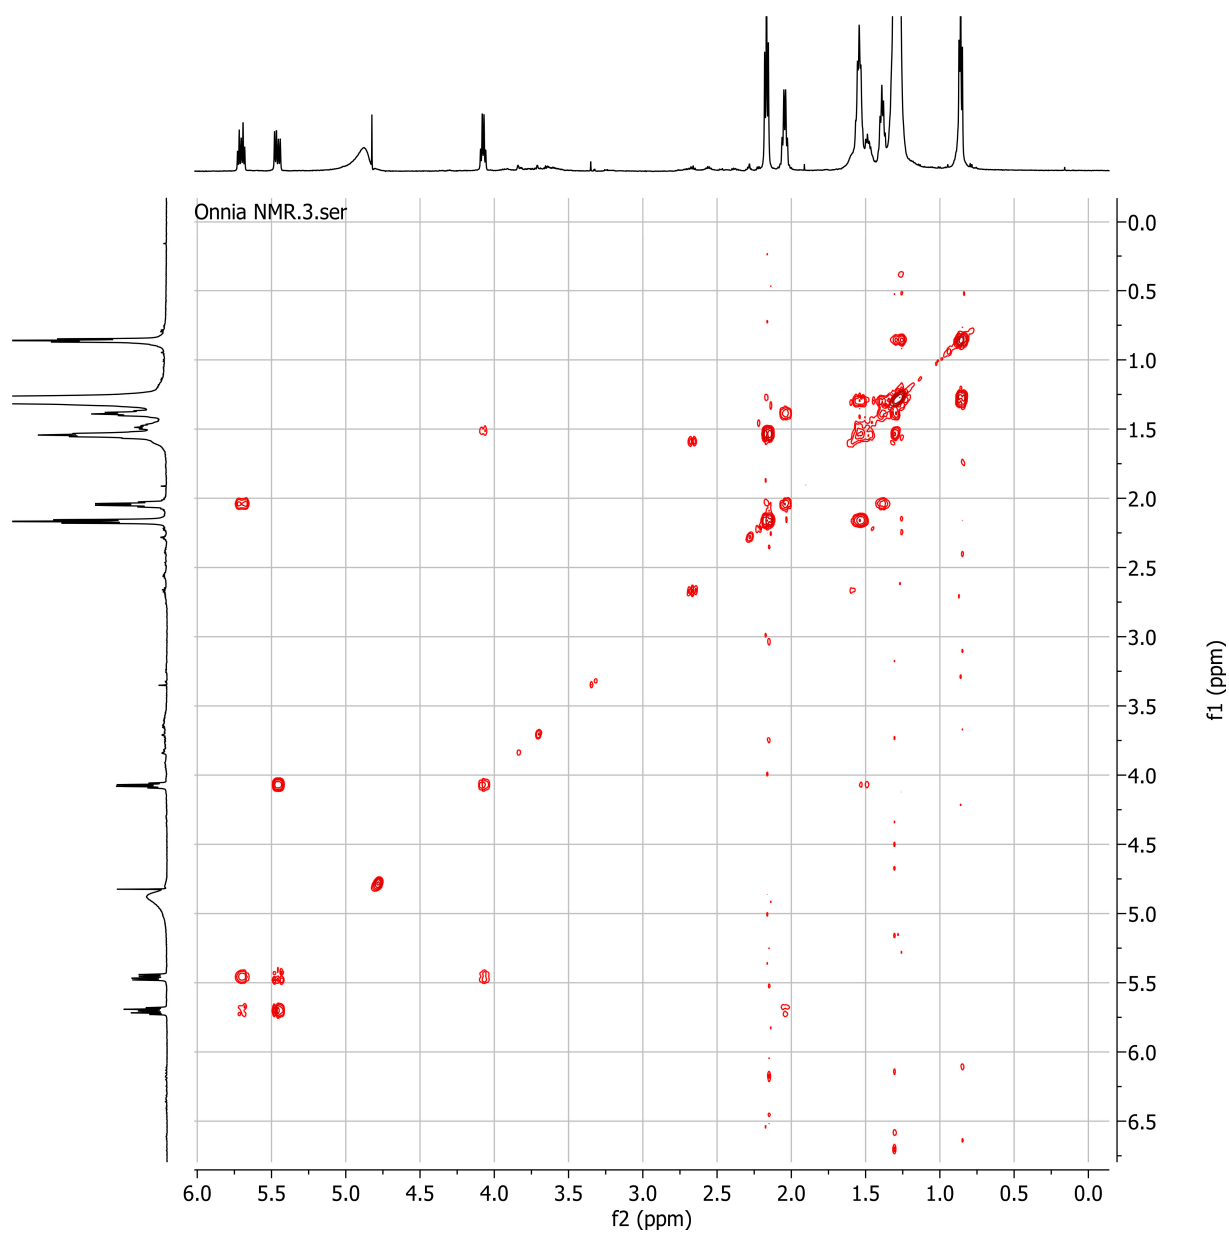

**Figure S19.** COSY ( $^1\text{H}$ - $^1\text{H}$ )-2D NMR spectrum of **5**. Sample was prepared in  $\text{D}_2\text{O}$ .

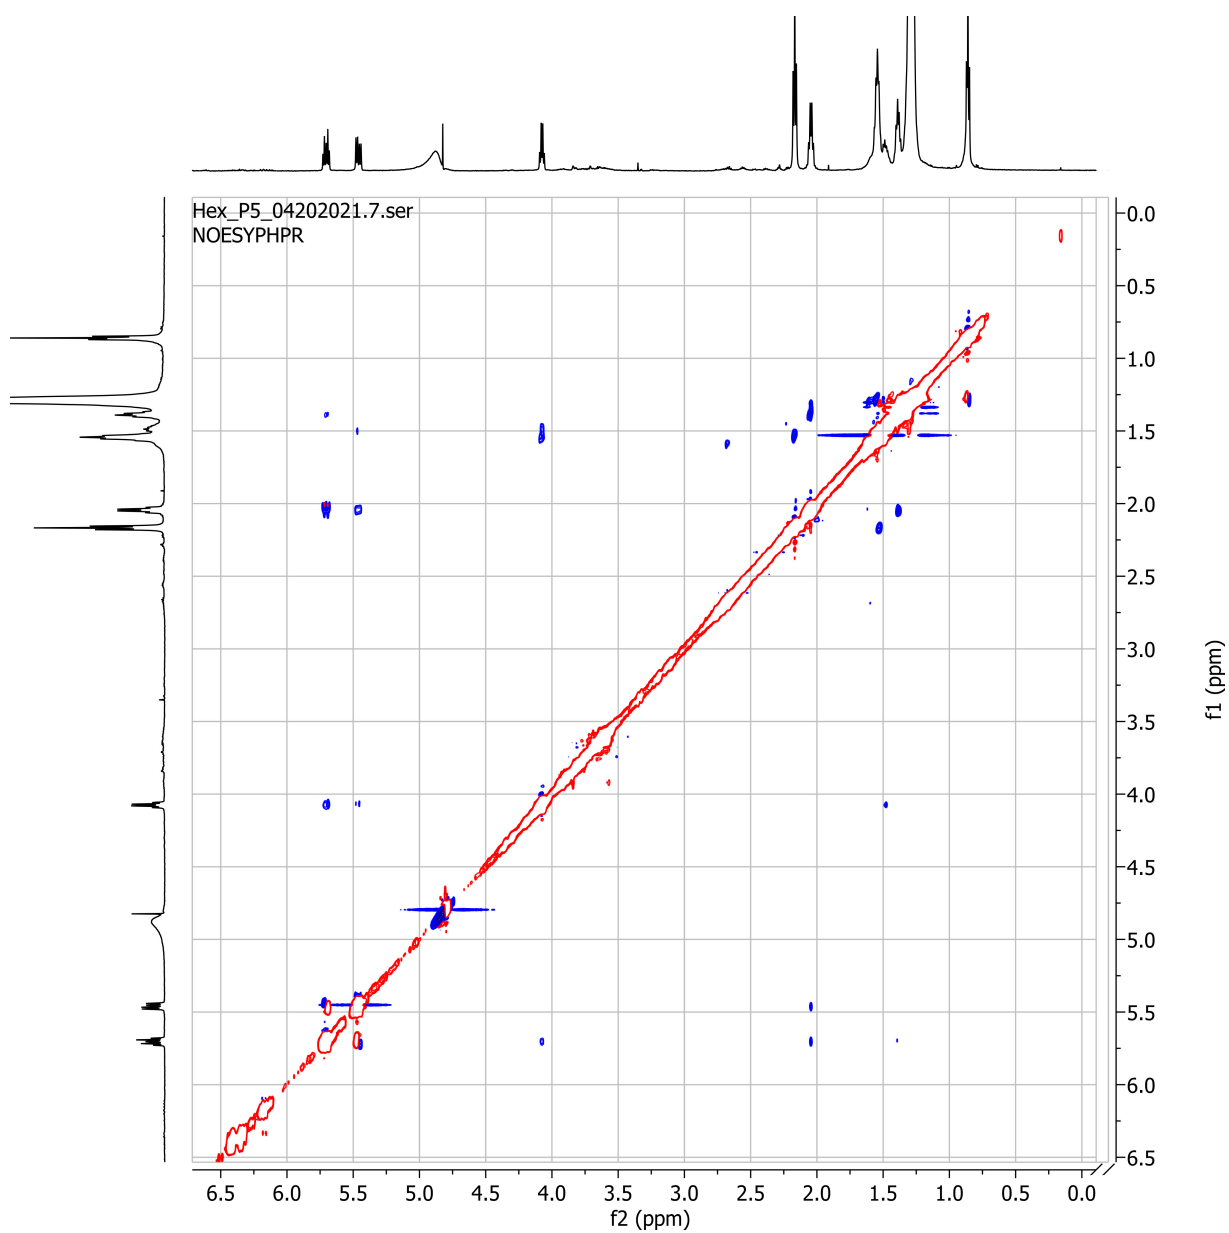

**Figure S20.** NOESY ( $^1\text{H}$ - $^1\text{H}$ )-2D NMR spectrum of **5**. Sample was prepared in  $\text{D}_2\text{O}$ .

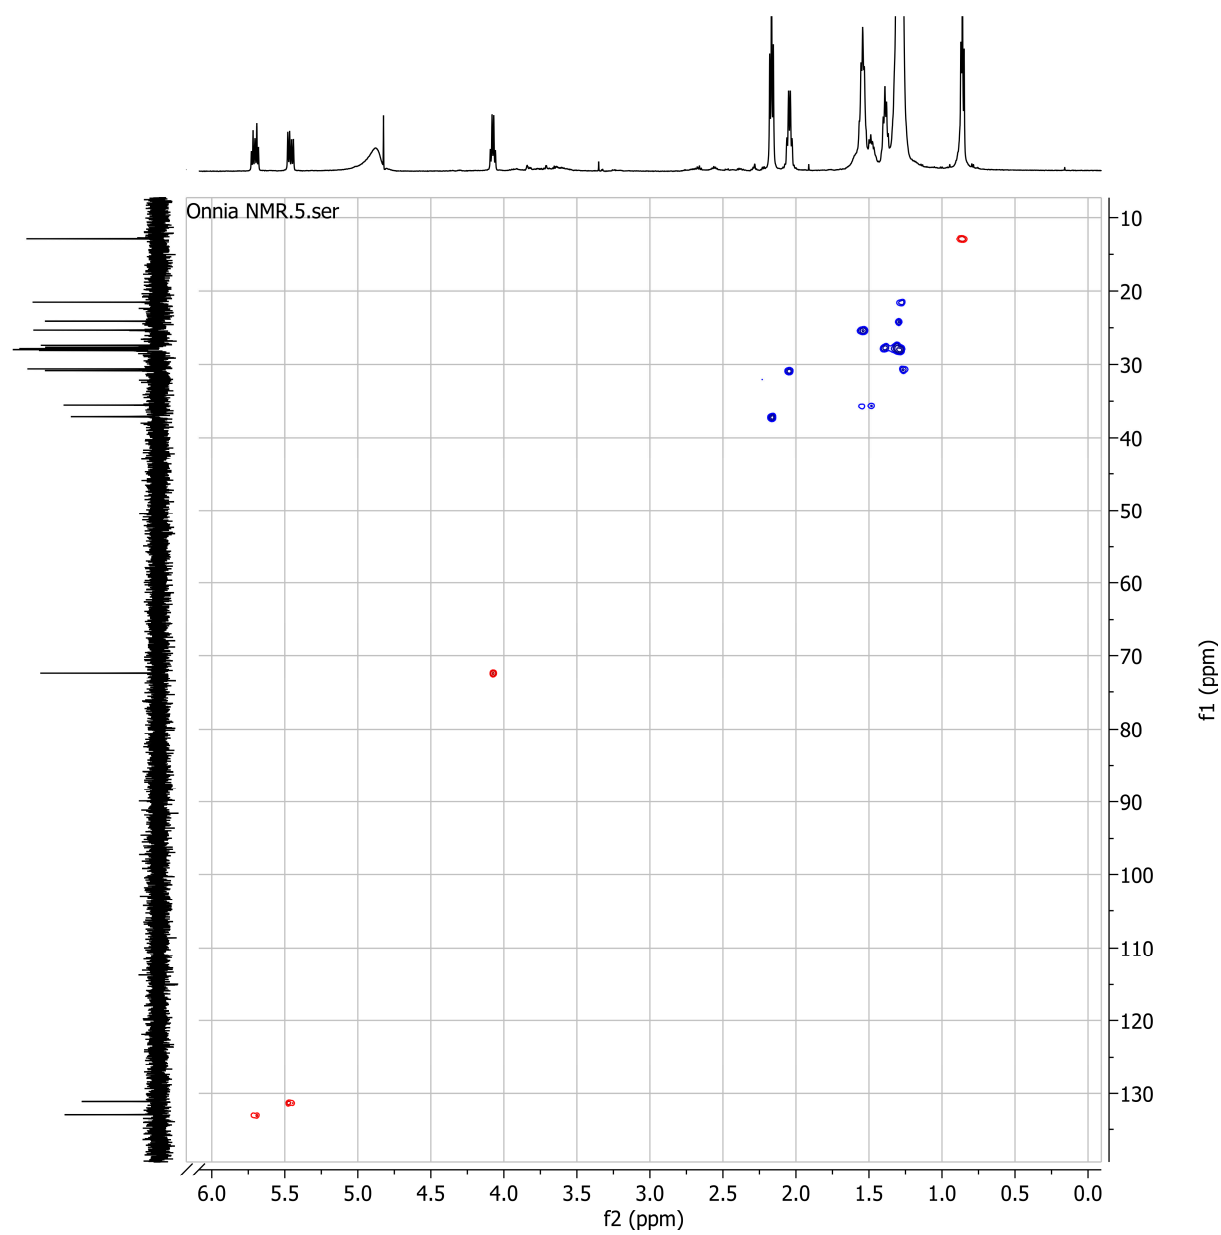

**Figure S21.** HSQC ( $^1\text{H}$ - $^{13}\text{C}$ )-2D NMR spectrum of **5**. Sample was prepared in  $\text{D}_2\text{O}$ .

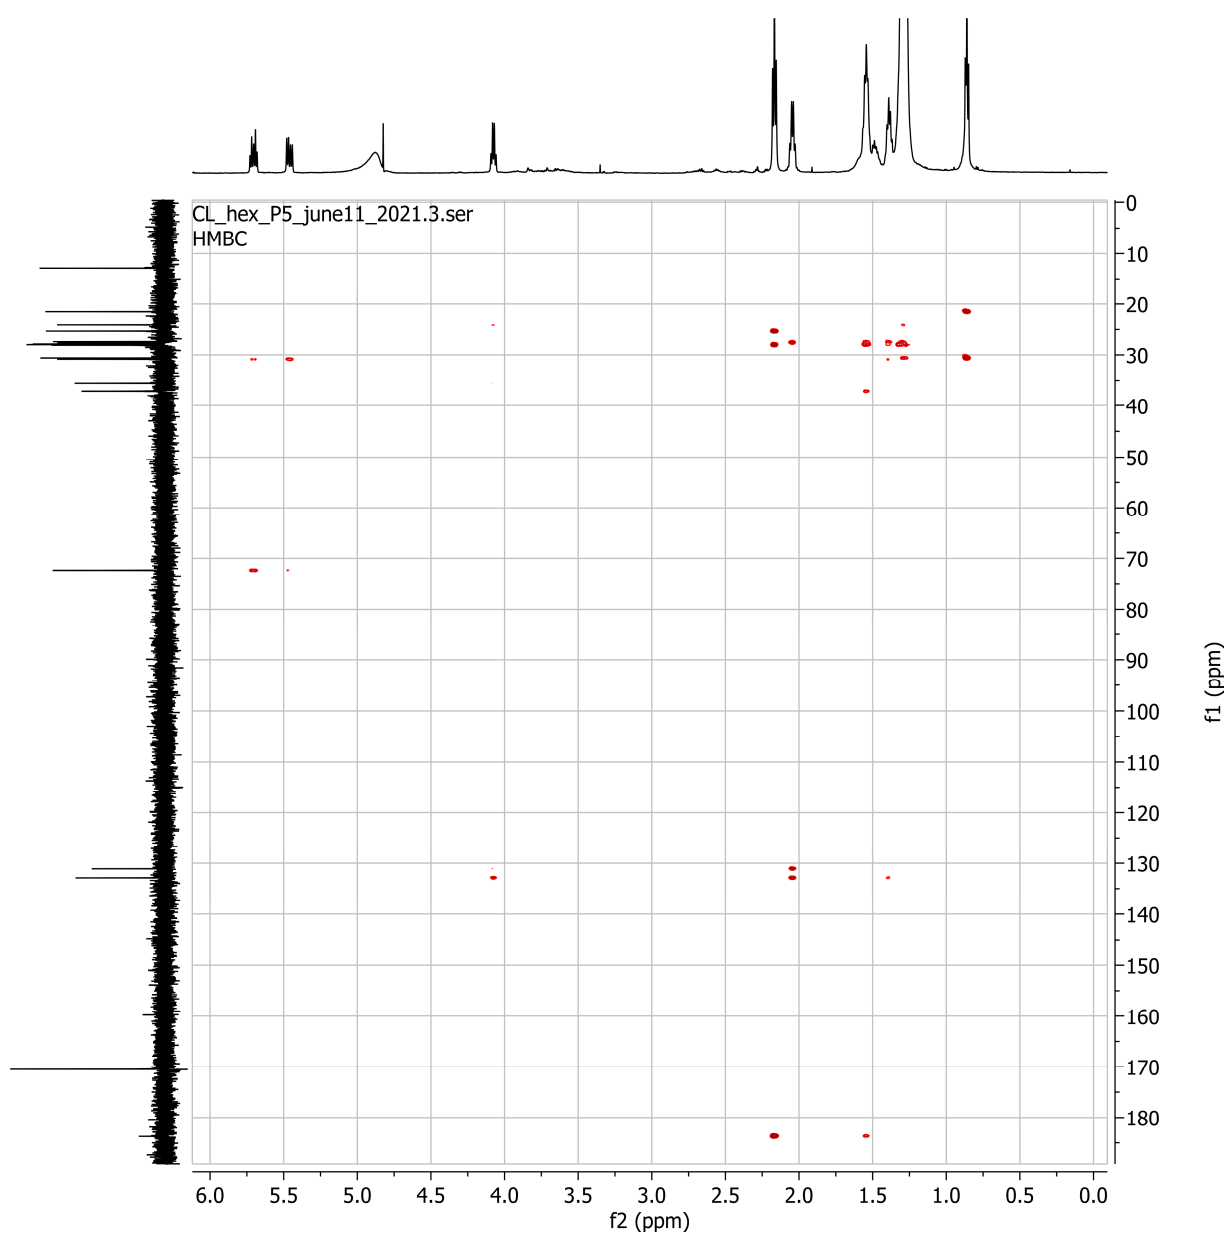

**Figure S22.** HMBC ( $^1\text{H}$ - $^{13}\text{C}$ )-2D NMR spectrum of **5**. Sample was prepared in  $\text{D}_2\text{O}$ .

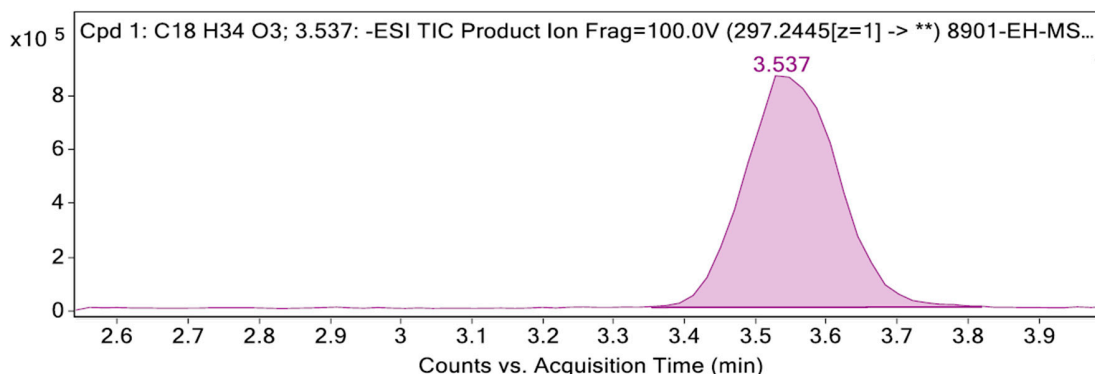

**Figure S23.** Extracted ion chromatogram (EIC) of compounds **5** isolated from *O. tomentosa*. Analysis was done using an Agilent Zorbax RRHD Eclipse Plus C18 column (2.1 mm × 50 mm × 1.8 μm) with an isocratic mobile phase composed of an H<sub>2</sub>O solution of 0.1% formic acid (solvent A) and CH<sub>3</sub>CN containing 0.1% formic acid (solvent B); flow rate of 0.15 mL/min. The isocratic elution program was set as follows: 0–5 min (70% B).

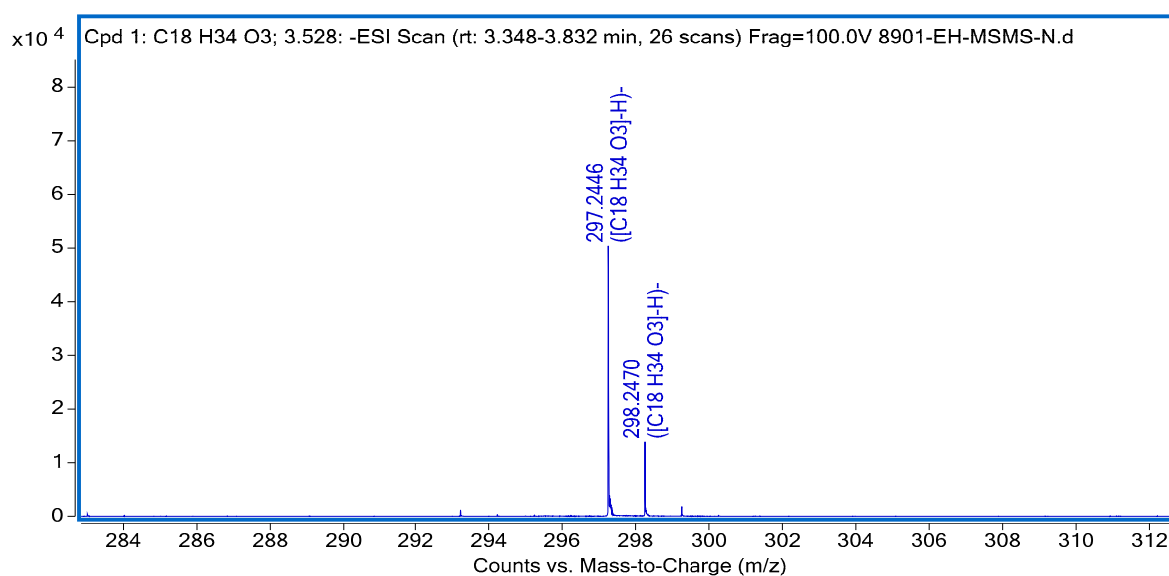

**Figure S24.** Isotope pattern of compound **5** isolated *O. tomentosa*.



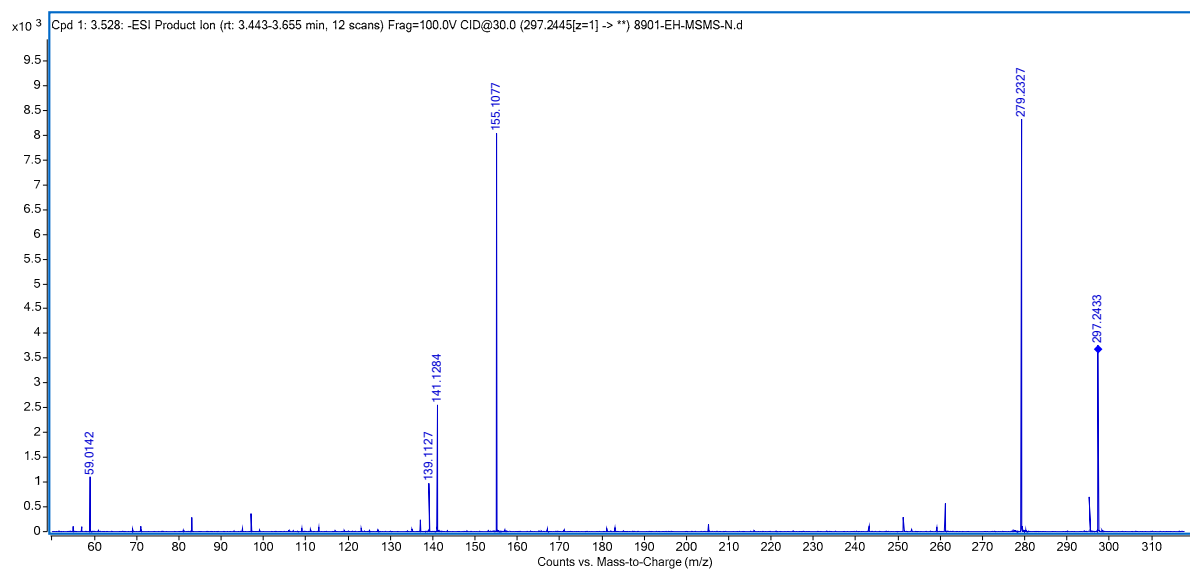

**Figure S25.** ESI-HRMS/MS spectrum of compound **5** isolated from *O. tomentosa*.

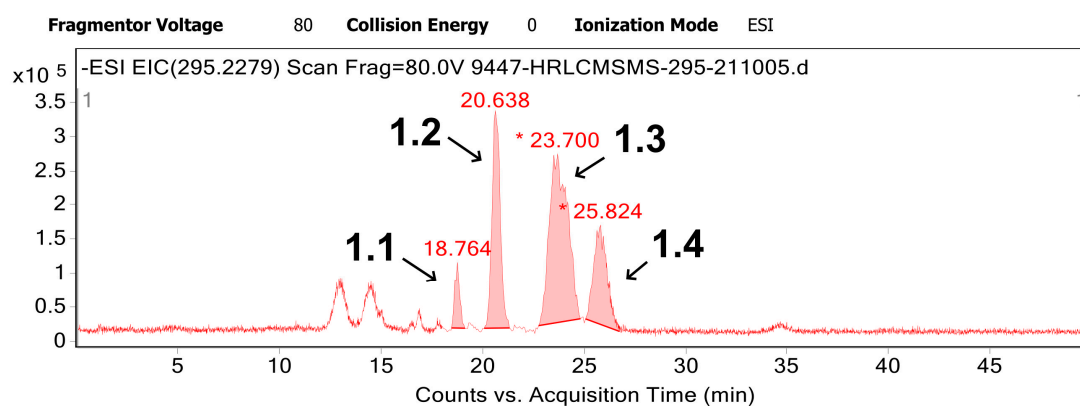

**Figure S26.** Extracted ion chromatogram (EIC) of compounds **1.1** to **1.4** isolated from *O. tomentosa*. Analysis was done using an Agilent Zorbax RRHD Eclipse Plus C18 column (2.1 mm × 50 mm × 1.8 μm) with an isocratic mobile phase composed of an H<sub>2</sub>O solution of 0.1% formic acid (solvent A) and CH<sub>3</sub>CN containing 0.1% formic acid (solvent B); flow rate of 0.5 mL/min. The isocratic elution program was set as follows: 0–50 min (48% B).

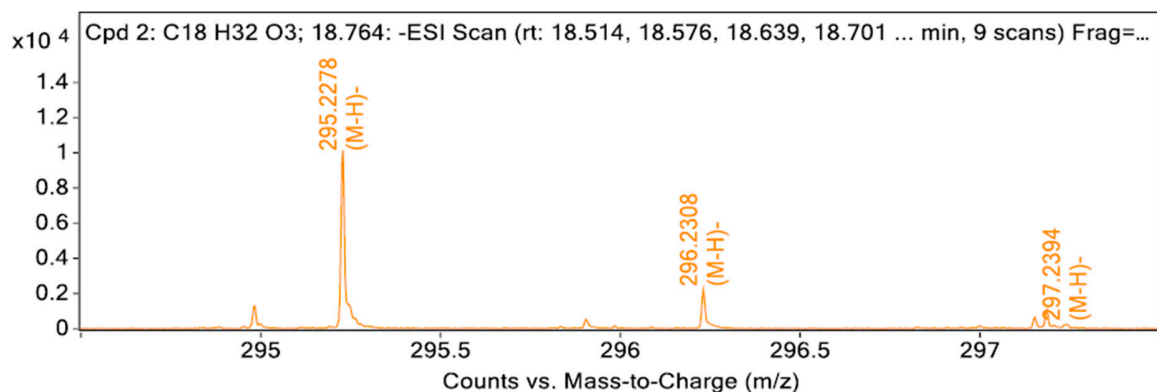

**Figure S27.** Isotope pattern of compound **1.1** isolated from *O. tomentosa*.

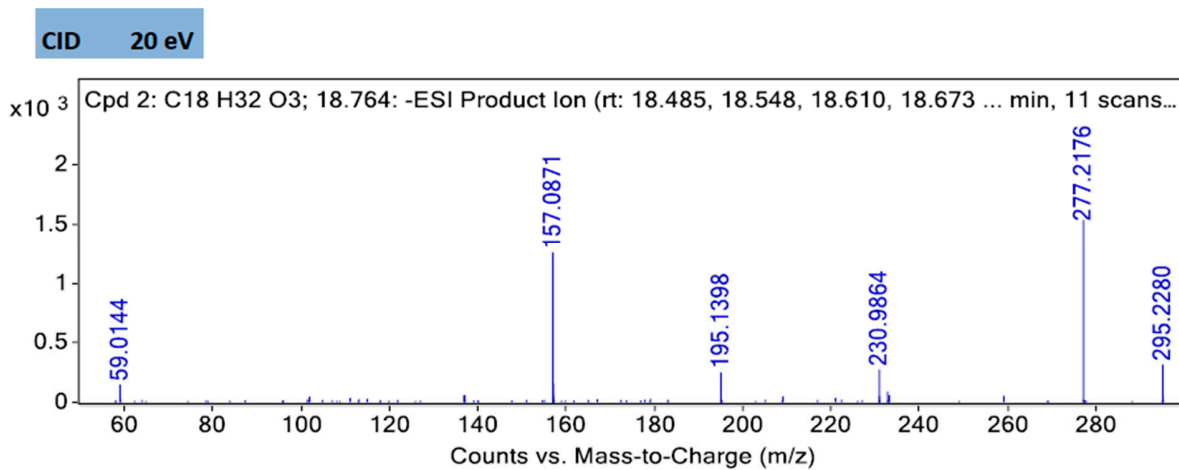

**Figure S28.** ESI-HRMS/MS spectrum of compound **1.1** isolated from *O. tomentosa*.

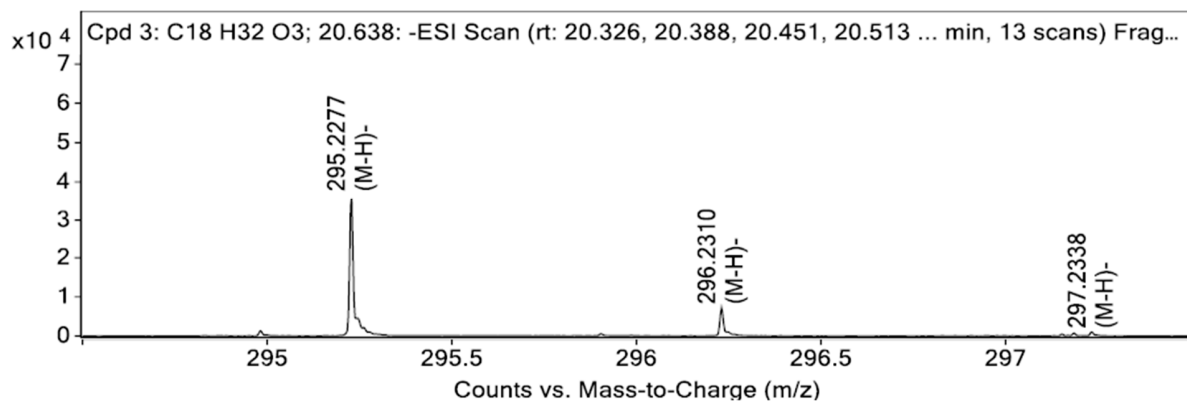

**Figure S29.** Isotope pattern of compound **1.2** isolated from *O. tomentosa*.

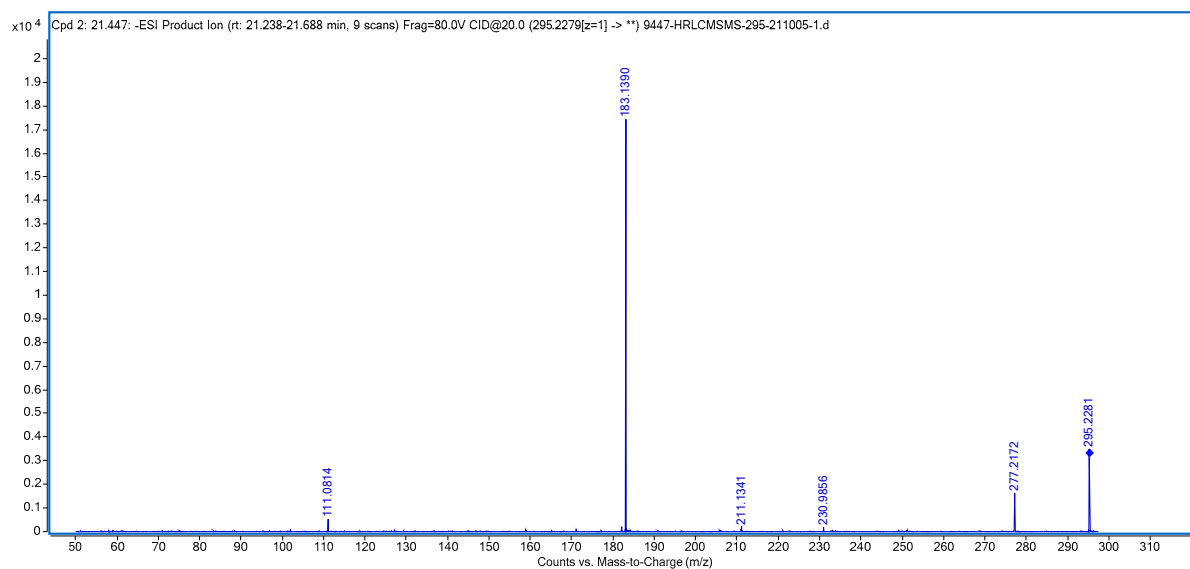

**Figure S30.** ESI-HRMS/MS spectrum of compound **1.2** isolated from *O. tomentosa*.

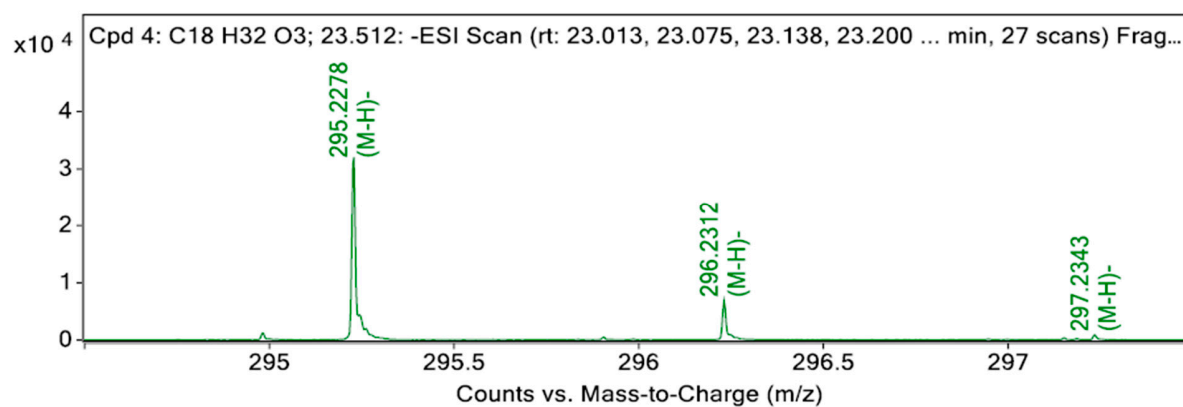

**Figure S31.** Isotope pattern of compound **1.3** isolated from *O. tomentosa*.

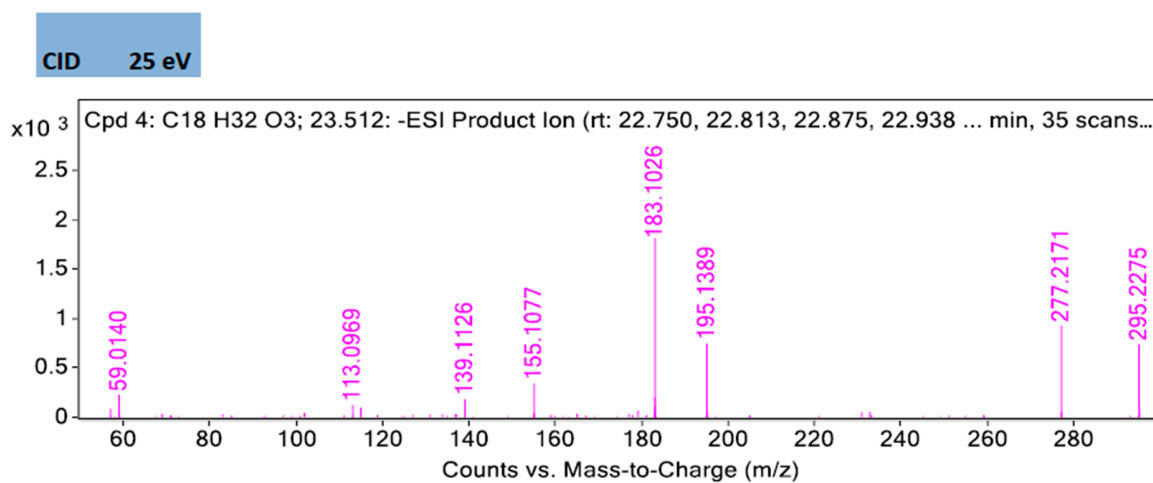

**Figure S32.** ESI-HRMS/MS spectrum of compound **1.3** isolated from *O. tomentosa*.

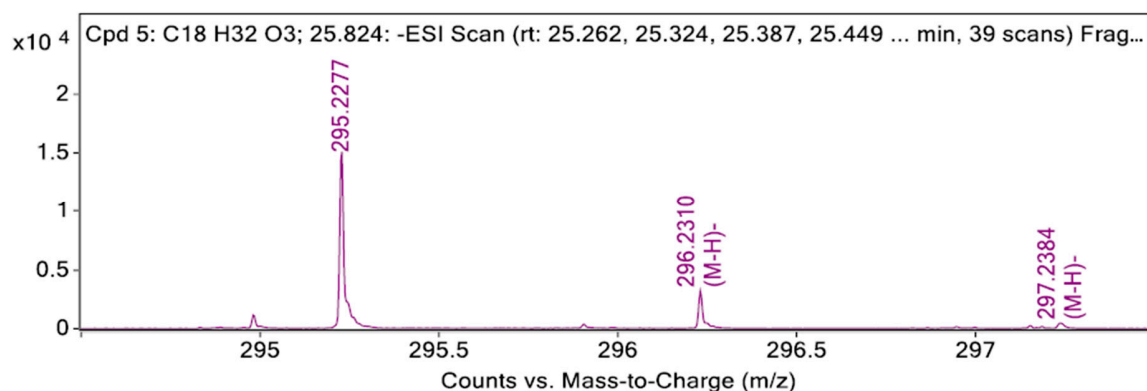

**Figure S33.** Isotope pattern of compound **1.4** isolated from *O. tomentosa*.

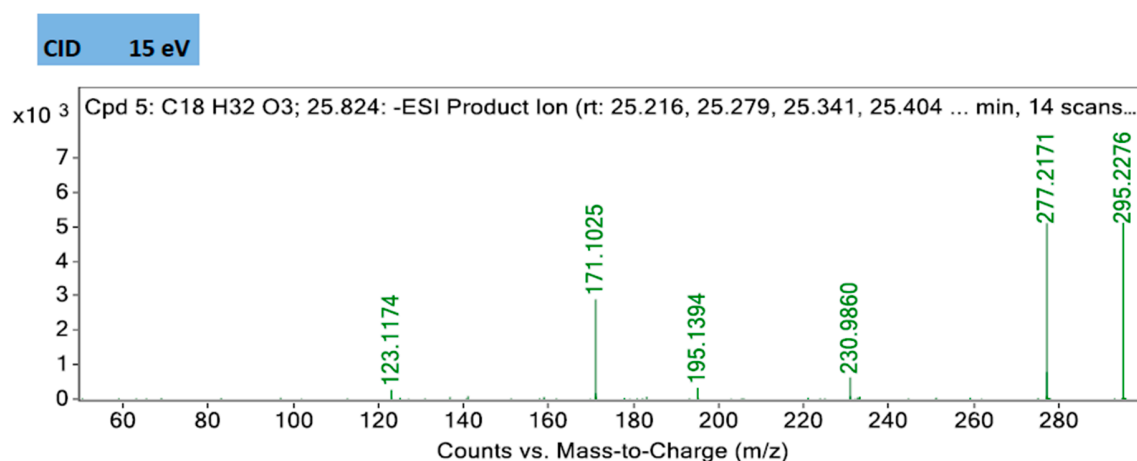

**Figure S34.** ESI-HRMS/MS spectrum of compound **1.4** isolated from *O. tomentosa*.

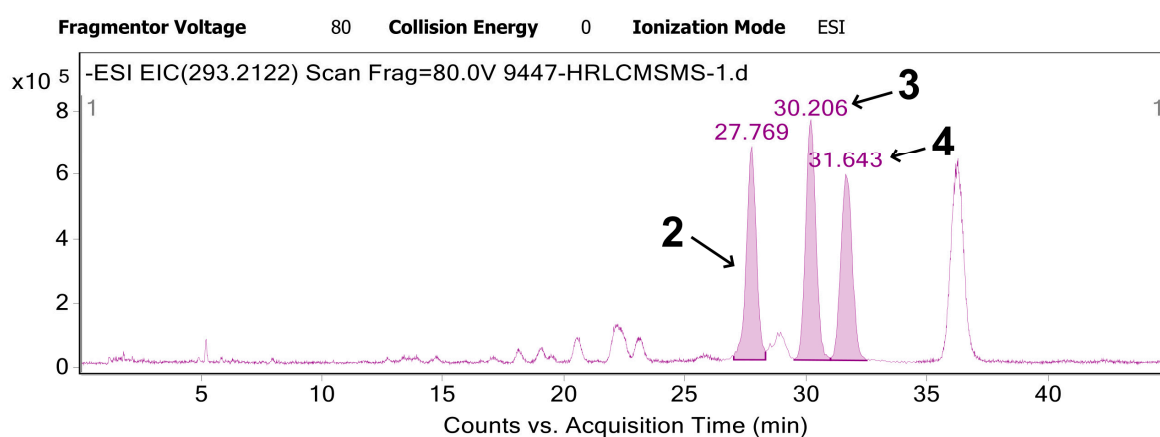

**Figure S35.** Extracted ion chromatogram (EIC) of compounds **2** to **4** isolated from *O. tomentosa*. The chromatographic system (column and solvents) used was as those described in Figure S26.

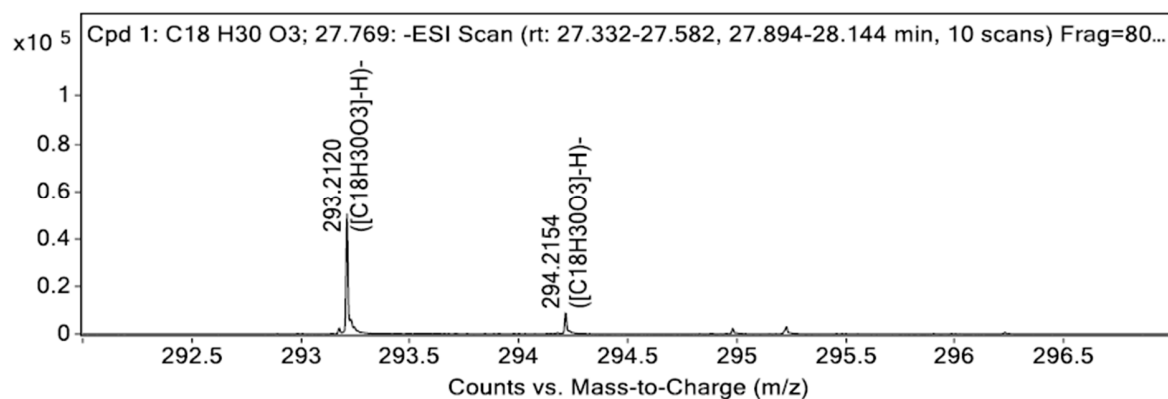

**Figure S36.** Isotope pattern of compound **2** isolated from *O. tomentosa*.

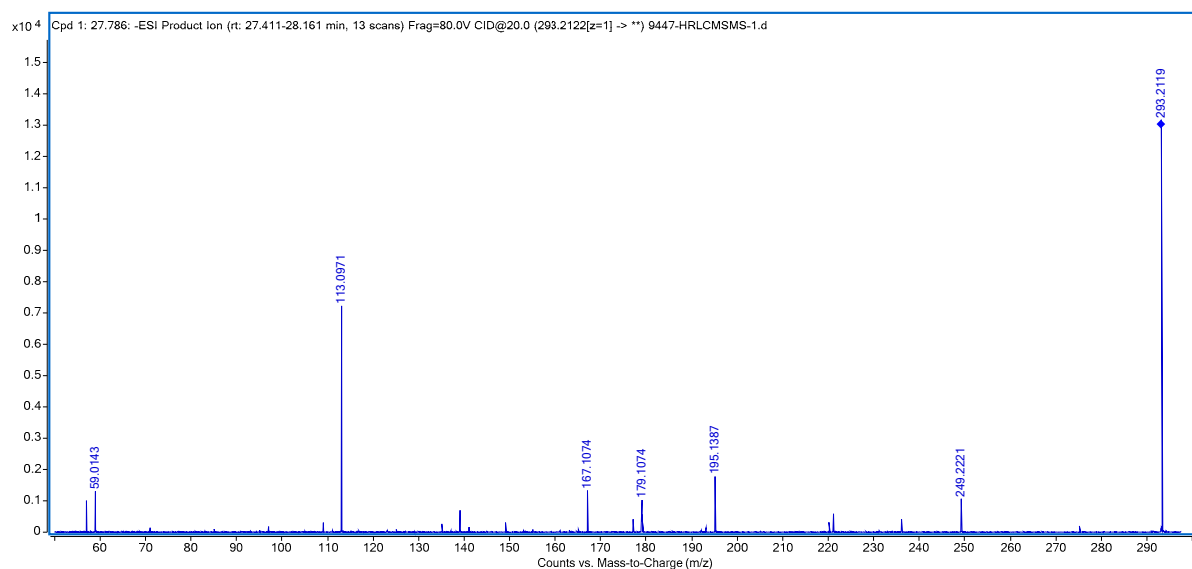

**Figure S37.** ESI-HRMS/MS spectrum of compound **2** isolated from *O. tomentosa*.

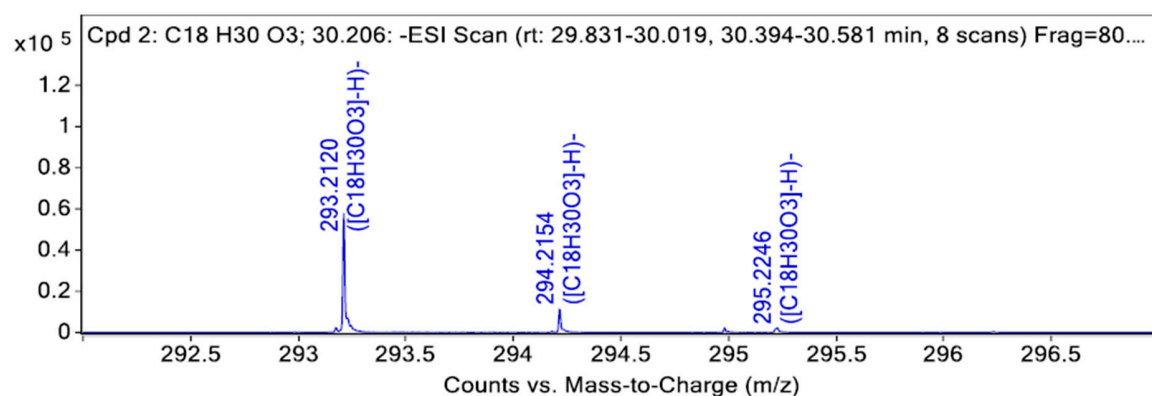

**Figure S38.** Isotope pattern of compound **3** isolated from *O. tomentosa*.

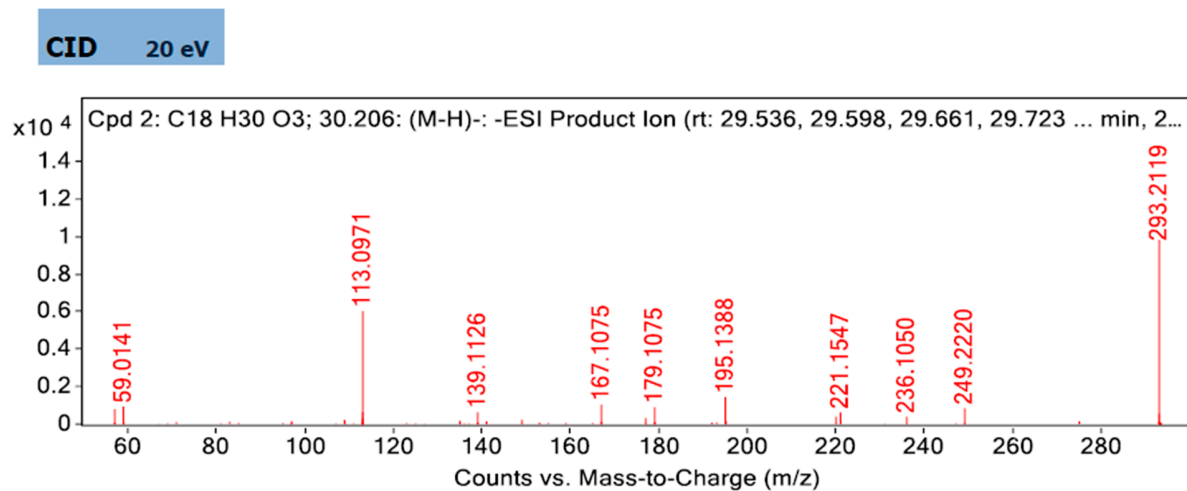

**Figure S39.** ESI-HRMS/MS spectrum of compound **3** isolated from *O. tomentosa*.

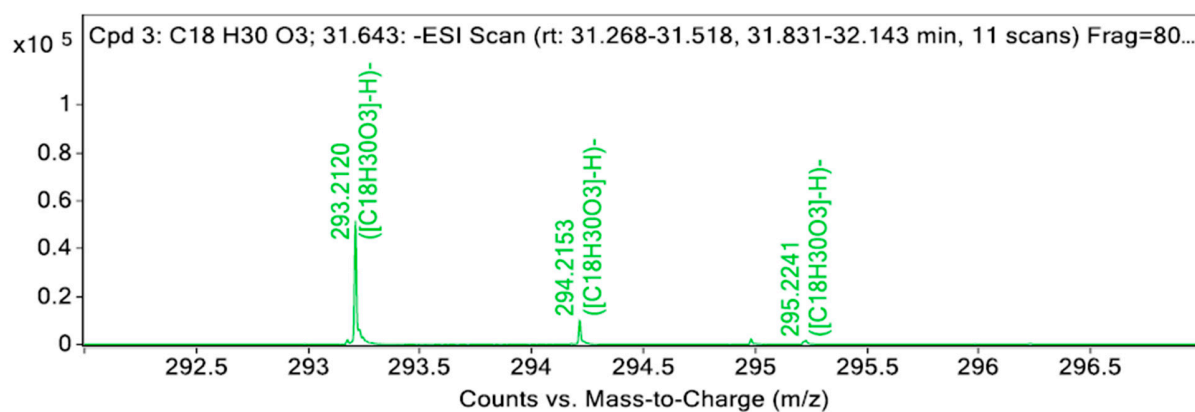

**Figure S40.** Isotope pattern of compound **4** isolated from *O. tomentosa*.

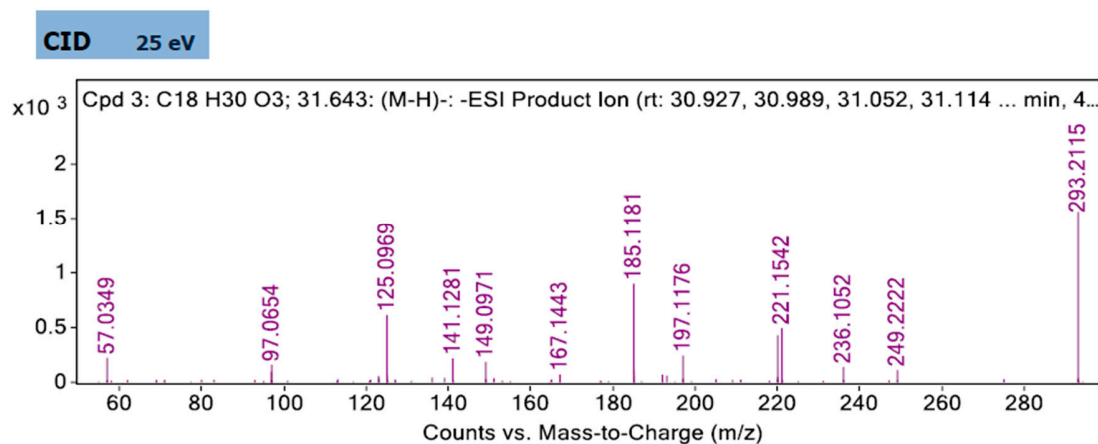

**Figure S41.** ESI-HRMS/MS spectrum of compound **4** isolated from *O. tomentosa*.

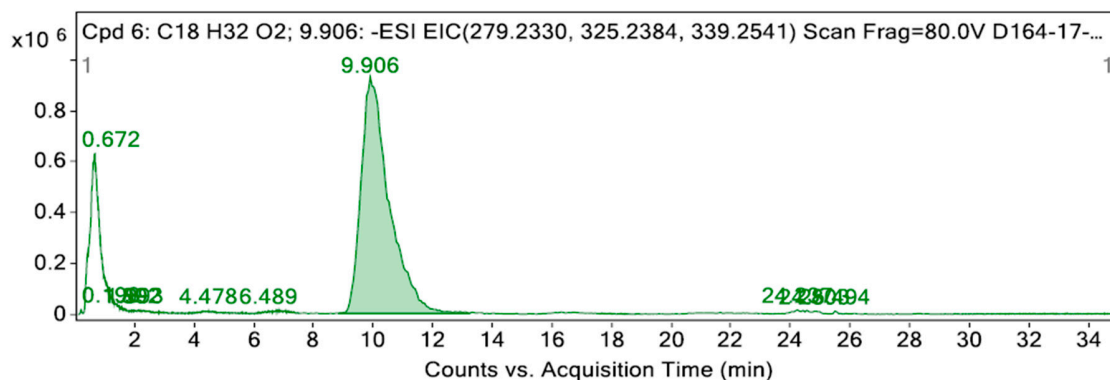

**Figure S42.** Extracted ion chromatogram (EIC) of compound **6** isolated from *O. tomentosa*. Analysis was done using an Agilent Infinity Lab Poroshell 120 EC-C18 column (2.1 mm × 50 mm × 2.7 μm) with a gradient mobile phase composed of an H<sub>2</sub>O solution of 0.1% formic acid (solvent A) and CH<sub>3</sub>CN containing 0.1% formic acid (solvent B); flow rate of 0.8 mL/min. The gradient elution program was set as follows: 0 min (52% B), 23 min (52% B), and 25 min (90% B).

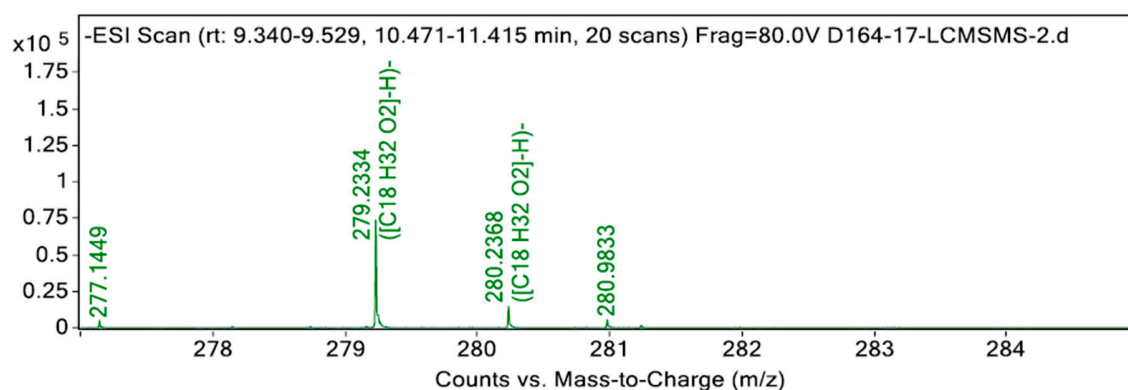

**Figure S43.** Isotope pattern of compound **6** isolated from *O. tomentosa*.

#### MSMS CID @ 30 eV

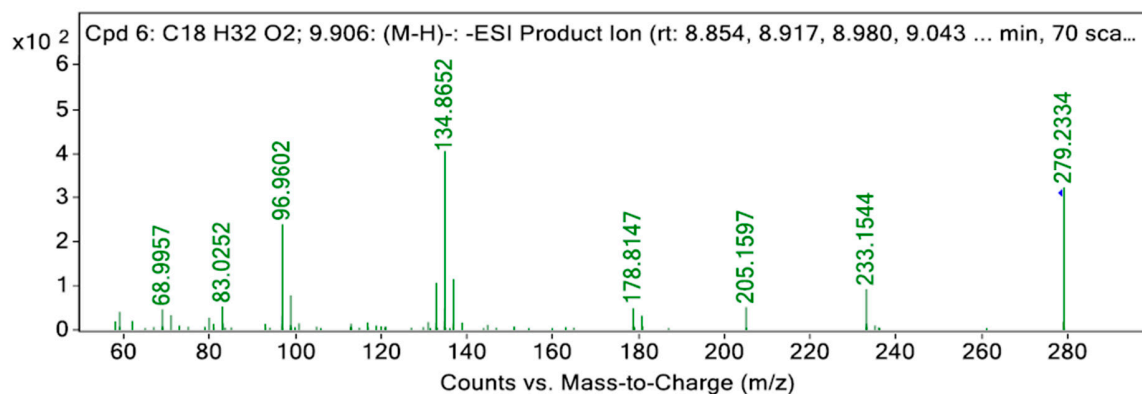

**Figure S44.** ESI-HRMS/MS spectrum of compound **6** isolated from *O. tomentosa*.

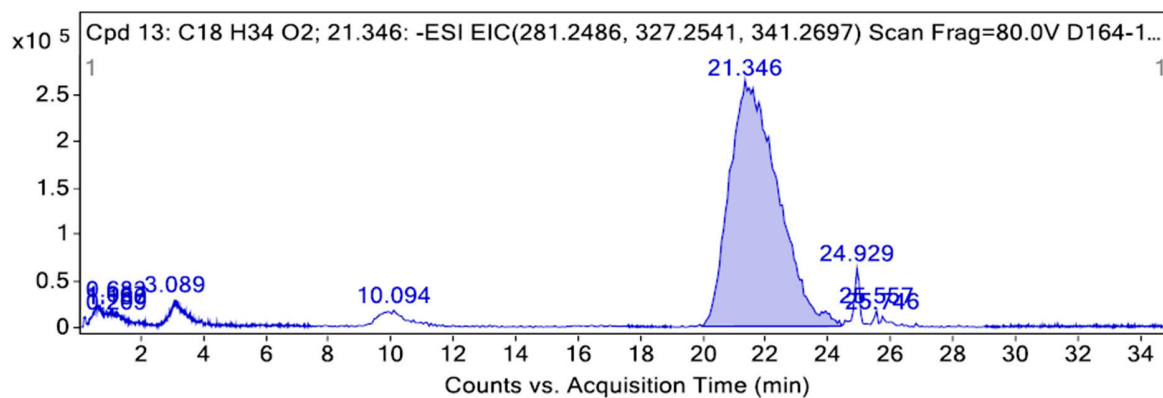

**Figure S45.** Extracted ion chromatogram (EIC) of compound **7** isolated from *O. tomentosa*. The chromatographic system (column and solvents) used was as those described in Figure S42.

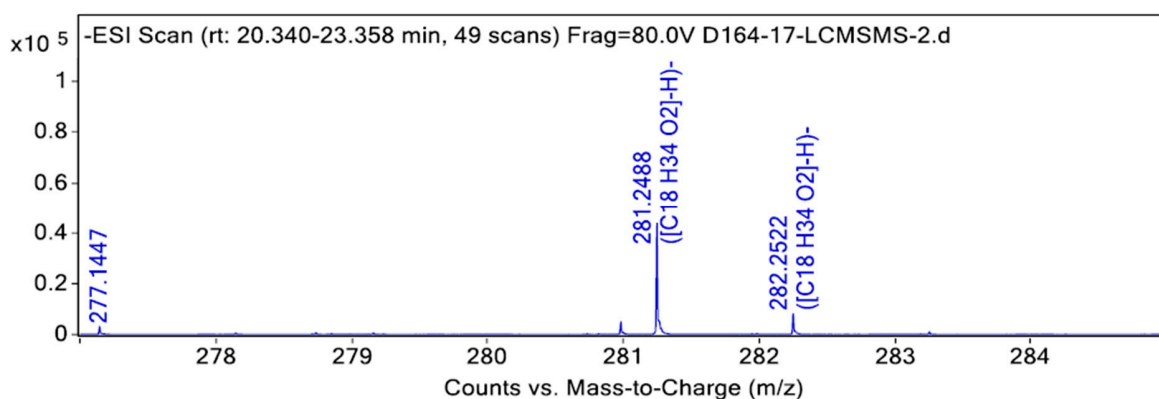

**Figure S46.** Isotope pattern of compound **7** isolated from *O. tomentosa*.

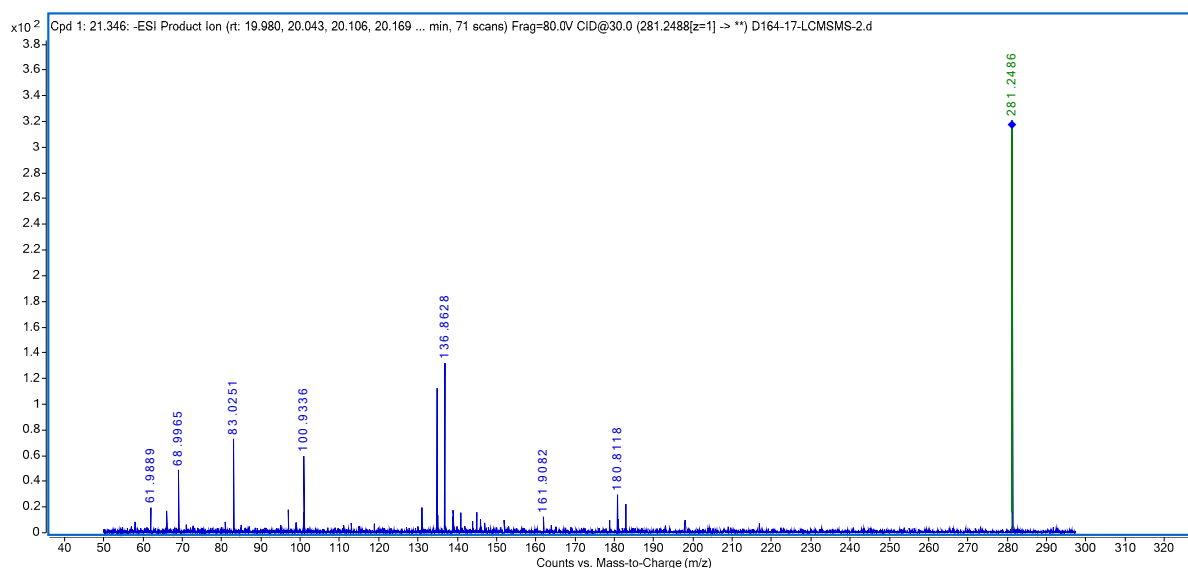

**Figure S47.** ESI-HRMS/MS spectrum of compound **7** isolated from *O. tomentosa*.



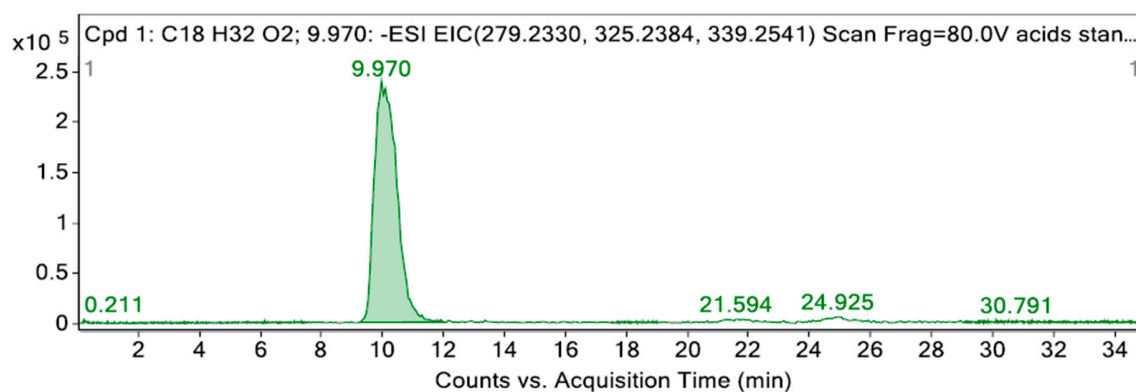

**Figure S48.** Extracted ion chromatogram (EIC) of pure standard linoleic acid. The chromatographic system (column and solvents) used was as those described in Figure S42.

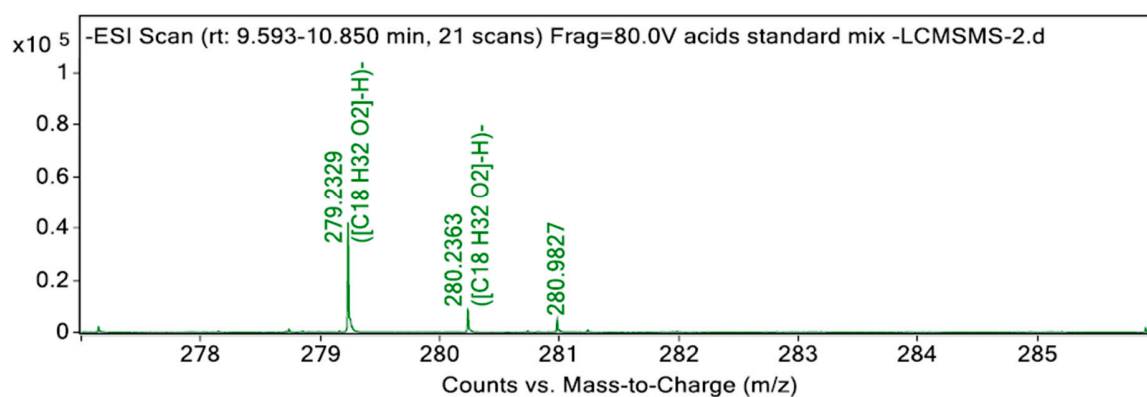

**Figure S49.** Isotope pattern of pure standard linoleic acid using ESI-HRMS.

#### MSMS CID @ 30 eV

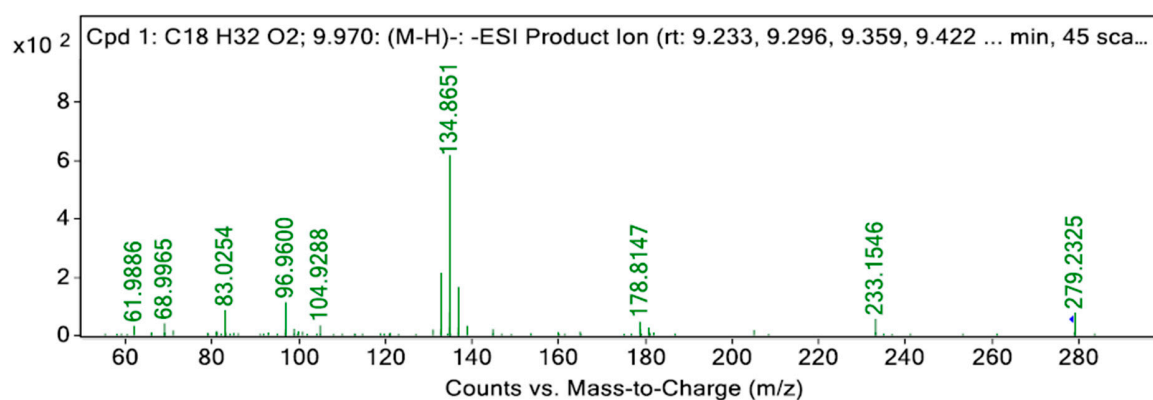

**Figure S50.** ESI-HRMS/MS spectrum of pure standard linoleic acid.

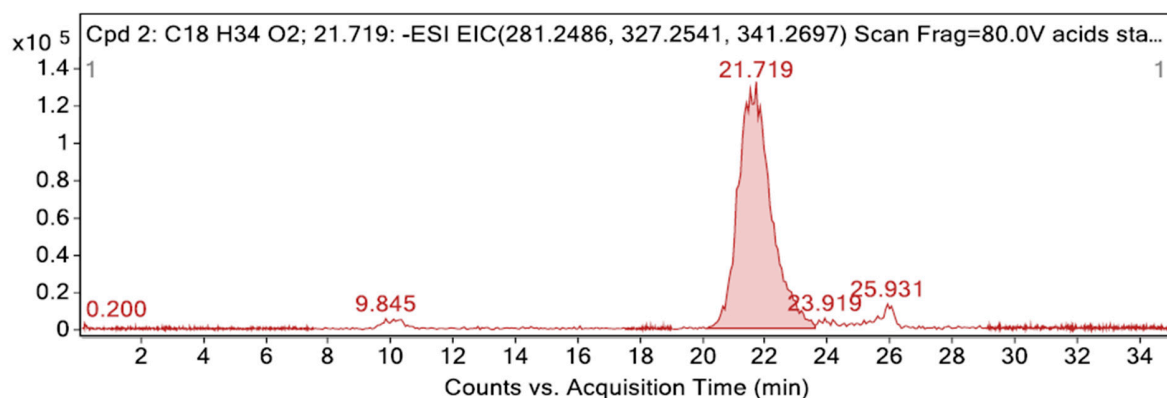

**Figure S51.** Extracted ion chromatogram (EIC) of pure standard oleic acid. The chromatographic system (column and solvents) used was as those described in Figure S42.

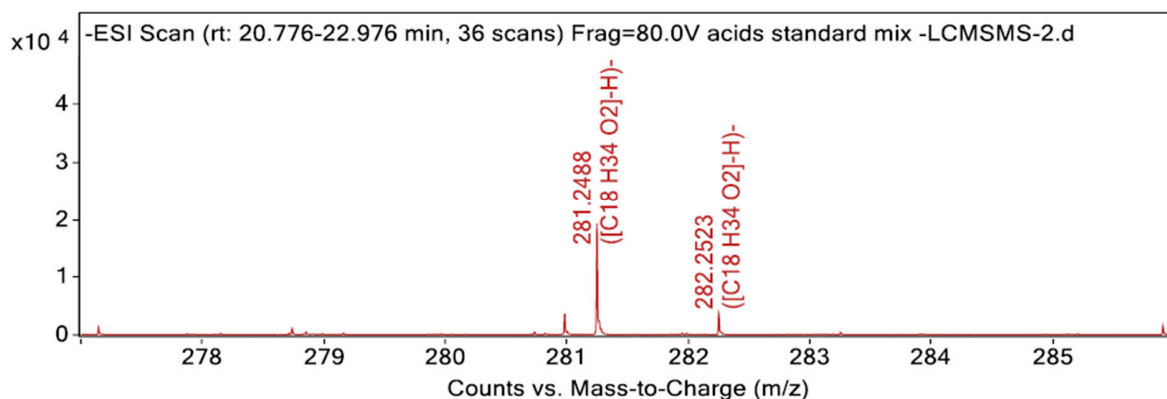

**Figure S52.** Isotope pattern of pure standard oleic acid using ESI-HRMS.

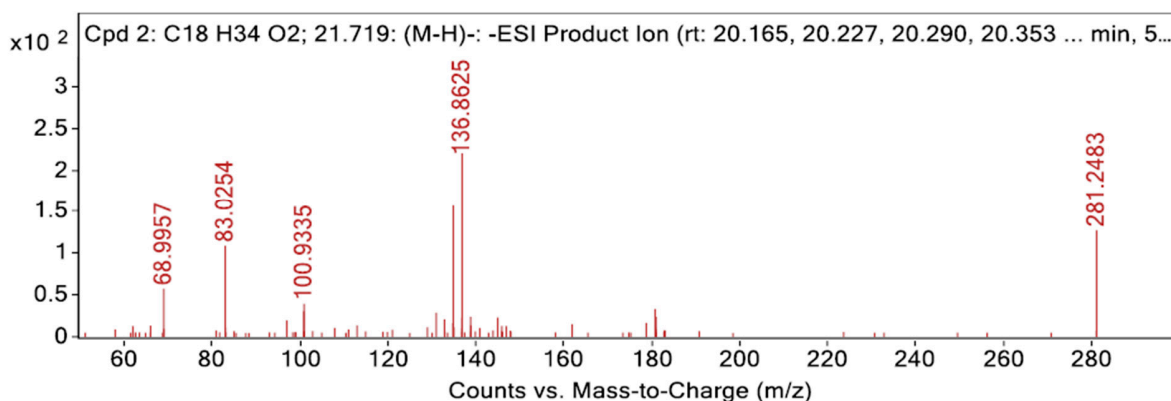

**Figure S53.** ESI-HRMS/MS spectrum of pure standard oleic acid.

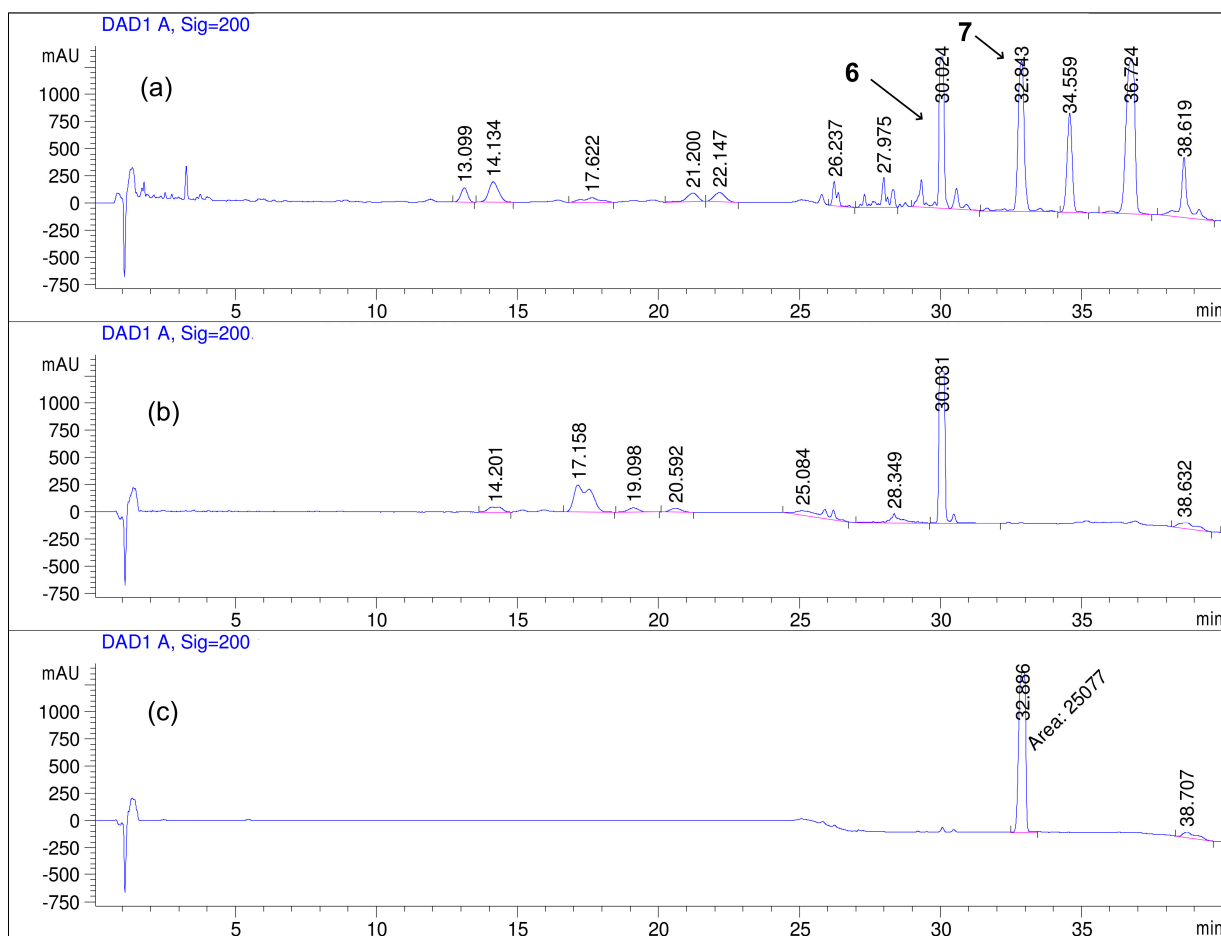

**Figure S54.** Comparative HPLC analyses of compounds **6** and **7** with their respective pure standards. (a) Post-Sephadex LH-20 sample from HEX layer; (b) linoleic acid; (c) oleic acid. The chromatographic system (column and solvents) used was as those described in Figure S12.

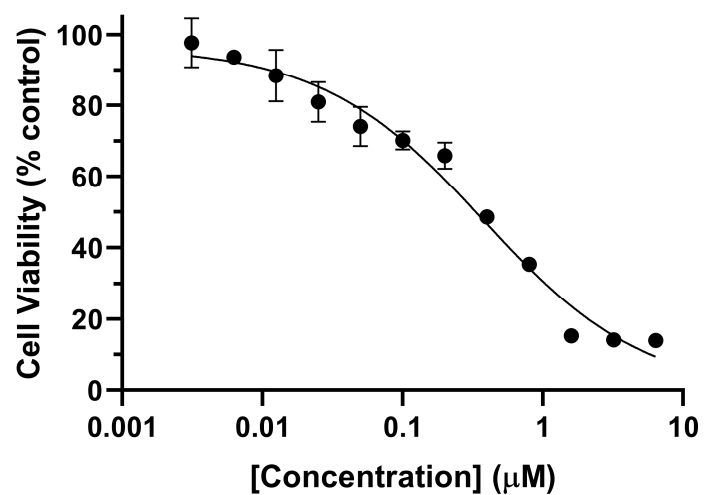

**Figure S55.** Effect of doxorubicin on HeLa cell viability. Cells were treated with different concentrations of doxorubicin (0.00312–6.4  $\mu\text{M}$ ) for 48 h, followed by cell viability assessment using the MTT assay. The result shown is representative data from three biological replicates ( $n = 3$ ). Error bars indicate standard deviation (S.D.).

**Table S1.** Collection information for the four mushroom species.

| Collection no. | Identity                        | Best GenBank match (% similarity/% coverage) | Collection site                             | Date           |
|----------------|---------------------------------|----------------------------------------------|---------------------------------------------|----------------|
| CL115          | <i>Fomitopsis officinalis</i>   | EU854436.1 (99.50%/83%)                      | Moore's Meadow, Prince George               | September 2015 |
| CL160          | <i>Echinodontium tinctorium</i> | KF996511.1 (98.84%/95%)                      | Twin Falls Recreation Site, Smithers        | September 2018 |
| CL206          | <i>Albatrellus flettii</i>      | JF899544.1 (99.82%/100%)                     | Twin Falls Recreation Site, Smithers        | August 2020    |
| CL83           | <i>Onnia tomentosa</i>          | KF996517.1 (99.22%/81%)                      | John Prince Research Forest, Fort St. James | August 2015    |
| CL312          | <i>Onnia tomentosa</i>          | KC152134.1 (99.41%/73%)                      | Greenway Trail, Prince George               | August 2021    |

**Table S2.** The fatty acid composition in the four different mushroom species (µg/g).

| Fatty acids           | <i>F. officinalis</i> | <i>E. tinctorium</i> | <i>A. flettii</i> | <i>O. tomentosa</i> |
|-----------------------|-----------------------|----------------------|-------------------|---------------------|
| C11:1                 | 0.0                   | 0.0                  | 58.5              | 0.0                 |
| C12:0                 | 168.9                 | 46.3                 | 46.0              | 78.2                |
| C12:1                 | 114.4                 | 25.7                 | 14.1              | 22.5                |
| C14:0                 | 70.5                  | 26.1                 | 107.4             | 104.4               |
| C14:1                 | 0.0                   | 28.7                 | 25.9              | 45.4                |
| C15:0                 | 70.2                  | 93.2                 | 645.0             | 332.6               |
| C15:1                 | 149.6                 | 33.7                 | 9.8               | 37.6                |
| C16:0                 | 1286.5                | 696.6                | 2462.7            | 3210.5              |
| C16:1                 | 58.4                  | 98.9                 | 266.3             | 161.5               |
| C16:1- <i>trans</i>   | 55.6                  | 43.3                 | 78.5              | 41.8                |
| C17:0                 | 75.4                  | 39.4                 | 673.4             | 63.7                |
| C17:1                 | 0.0                   | 52.4                 | 0.0               | 0.0                 |
| C18:0                 | 961.6                 | 496.2                | 1131.3            | 987.0               |
| C18:1 (oleic)         | 12180.3               | 1652.9               | 6900.0            | 5363.8              |
| C18:1 (vaccenic)      | 555.6                 | 132.7                | 678.3             | 342.3               |
| C18:2n6               | 3651.0                | 755.9                | 15677.6           | 11012.4             |
| C18:2n6- <i>trans</i> | 0.0                   | 21.6                 | 24.0              | 28.7                |
| C18:3n3               | 1.0                   | 5.9                  | 56.2              | 45.7                |
| C18:3n6               | 86.0                  | 21.4                 | 25.3              | 24.2                |
| C18:4n3               | 94.9                  | 16.0                 | 9.4               | 0.0                 |
| C19:1                 | 0.0                   | 8.1                  | 35.6              | 0.0                 |
| C20:0                 | 65.6                  | 44.4                 | 127.7             | 62.8                |
| C20:1n11- <i>cis</i>  | 89.5                  | 27.1                 | 70.3              | 57.5                |
| C20:1n15- <i>cis</i>  | 715.6                 | 58.2                 | 73.5              | 47.5                |
| C20:2n6               | 64.6                  | 17.9                 | 346.8             | 71.8                |
| C20:3n6               | 219.4                 | 40.7                 | 36.0              | 50.1                |

|                                    |         |        |         |         |
|------------------------------------|---------|--------|---------|---------|
| C20:4n6                            | 65.7    | 65.5   | 31.9    | 48.9    |
| C20:5n3                            | 5.9     | 12.9   | 23.6    | 67.6    |
| C22:0                              | 83.4    | 51.7   | 284.4   | 74.6    |
| C22:1                              | 59.7    | 9.8    | 77.8    | 16.5    |
| C22:4n6                            | 70.3    | 0.0    | 0.0     | 0.0     |
| C22:5n6                            | 117.9   | 2.3    | 0.0     | 0.0     |
| C22:6n3                            | 155.3   | 108.2  | 167.4   | 96.2    |
| C24:0                              | 37.9    | 22.3   | 22.1    | 21.9    |
| C24:1                              | 0.0     | 0.0    | 61.8    | 190.0   |
| Total Fatty Acid (as T.G.)         | 21330.7 | 4758.8 | 30307.6 | 22760.7 |
| SFAs (μg)                          | 2820.0  | 1516.1 | 5500.0  | 4935.6  |
| MUFAs (μg)                         | 13978.6 | 2174.4 | 8362.7  | 6338.9  |
| PUFAs (μg)                         | 4532.0  | 1068.3 | 16444.8 | 11486.2 |
| Omega-3 Fatty Acids                | 257.1   | 143.0  | 267.8   | 220.8   |
| Omega-6 Fatty Acids                | 4274.9  | 925.3  | 16177.0 | 11265.4 |
| <i>trans</i> Fatty Acids           | 55.6    | 64.9   | 102.5   | 70.5    |
| g of fatty acids/100g dried sample | 2.1     | 0.5    | 3.0     | 2.3     |

SFAs:  $\Sigma$ saturated fatty acids; MUFAs:  $\Sigma$ monounsaturated fatty acids; PUFAs:  $\Sigma$ polyunsaturated fatty acids. Fatty acids at < 0.2% of the total fatty acid yield were excluded.

**Table S3.** The fatty acids composition in different *Inonotus* species.

| Fatty acids | <i>I. hispidus</i> [1] | <i>I. obliquus</i> [2] | <i>I. radiatus</i> [1] |
|-------------|------------------------|------------------------|------------------------|
| C15:0       | <b>6.4</b>             | 1.16                   | 1.4                    |
| C16:0       | 1.8                    | <b>13.1</b>            | <b>11.9</b>            |
| C18:1       | <b>27.9</b>            | -                      | <b>39.6</b>            |
| C18:2n6     | 3.2                    | <b>21.5</b>            | <b>35.2</b>            |
| C20:0       | <b>47.9</b>            | -                      | 0.6                    |

Bold font indicates the major fatty acids detected in the respective species.

## References

1. Olennikov, D.N.; Sof'ya, V.A.; Tat'yana, A.P.; Borovski, G.B. Fatty acid composition of fourteen wood-decaying basidiomycete species growing in permafrost conditions. *Rec. Nat. Prod.* **2014**, *8*, 184.
2. Ayoub, N.; Lass, D.; Schultze, W. Volatile constituents of the medicinal fungus chaga *Inonotus obliquus* (Pers.: Fr.) Pilát (Aphyllophoromycetideae). *Int J Med Mushrooms* **2009**, *11*.
